# Supplementary material
Source: publisher site journal article supplement (https://www.dovepress.com/article/527263)
Supplement: Supplementary file 1 [file 527263%20Revised%20Supplementary%20Material.docx]

**Supplementary Material**

**Table A.1** Global COPD deaths and DALY rate burden attributable to PMP, by age group for combined sexes, and its EAPC from 1990 to 2021.

| **Age** | **Sex** | **Deaths rate**  **No. (95% UI)** | | | **DALYs rate**  **No. (95% UI)** | | |
| --- | --- | --- | --- | --- | --- | --- | --- |
| **1990** | **2021** | **EAPC**  **No. (95% CI)** | **1990** | **2021** | **EAPC**  **No. (95% CI)** |
|
| 25-29 years | Both | 0.59  (0.45to0.71) | 0.25  (0.19to0.31) | -3.3  (-3.15to-3.45) | 65.06  (52.85to76.23) | 38.76  (30.31to47.63) | -2.04  (-1.94to-2.14) |
| Male | 0.61  (0.45to0.74) | 0.27  (0.19to0.35) | -3.22  (-3.07to-3.37) | 63.85  (51.14to75.88) | 38.16  (29.17to47.44) | -2.04  (-1.93to-2.15) |
| Female | 0.57  (0.36to0.75) | 0.23  (0.16to0.33) | -3.39  (-3.23to-3.54) | 66.27  (50.76to80.22) | 39.38  (30.32to48.65) | -2.05  (-1.96to-2.15) |
| 30-34 years | Both | 1.02  (0.79to1.23) | 0.41  (0.32to0.51) | -3.49  (-3.27to-3.72) | 93.45  (76.58to109.35) | 50.95  (39.98to62.07) | -2.29  (-2.12to-2.47) |
| Male | 1.1  (0.84to1.31) | 0.46  (0.32to0.59) | -3.23  (-3to-3.46) | 95.08  (76.51to112.71) | 52.12  (40.42to64.8) | -2.23  (-2.05to-2.41) |
| Female | 0.94  (0.58to1.22) | 0.35  (0.25to0.47) | -3.83  (-3.6to-4.06) | 91.77  (68.15to111.66) | 49.76  (37.7to62.29) | -2.36  (-2.2to-2.53) |
| 35-39 years | Both | 1.95  (1.53to2.34) | 0.68  (0.54to0.84) | -3.6  (-3.44to-3.76) | 145.34  (120.71to170.18) | 68.44  (54.16to81.99) | -2.55  (-2.42to-2.68) |
| Male | 2.16  (1.69to2.63) | 0.79  (0.58to1.01) | -3.37  (-3.19to-3.55) | 152.83  (124.2to181.33) | 72.31  (56.08to89.71) | -2.51  (-2.36to-2.66) |
| Female | 1.74  (1.12to2.22) | 0.56  (0.4to0.75) | -3.92  (-3.75to-4.09) | 137.62  (100.64to166.09) | 64.49  (49.14to79.17) | -2.59  (-2.46to-2.71) |
| 40-44 years | Both | 4.07  (3.2to4.82) | 1.47  (1.15to1.82) | -3.66  (-3.53to-3.79) | 249.04  (202.67to290) | 111.85  (88.98to135.62) | -2.84  (-2.75to-2.93) |
| Male | 4.88  (3.82to5.86) | 1.9  (1.36to2.39) | -3.4  (-3.29to-3.52) | 284.22  (228.36to333) | 130.15  (100.53to160.38) | -2.8  (-2.71to-2.88) |
| Female | 3.23  (2.07to4.12) | 1.03  (0.75to1.35) | -4.06  (-3.89to-4.23) | 212.34  (152.52to261.94) | 93.26  (71.97to113.92) | -2.89  (-2.78to-3) |
| 45-49 years | Both | 8.4  (6.6to9.98) | 3.12  (2.48to3.83) | -3.43  (-3.33to-3.54) | 453.36  (368.08to526.7) | 200.81  (159.83to241.35) | -2.81  (-2.73to-2.89) |
| Male | 10.26  (7.75to12.33) | 4.01  (2.96to5.05) | -3.15  (-3.07to-3.24) | 529.08  (423.71to625.9) | 236.45  (181.21to291.28) | -2.71  (-2.63to-2.79) |
| Female | 6.46  (4.2to8.19) | 2.22  (1.61to2.9) | -3.9  (-3.69to-4.1) | 374.59  (271.79to458.42) | 164.85  (125.78to204.89) | -2.94  (-2.81to-3.07) |
| 50-54 years | Both | 21.07  (16.67to24.7) | 7.14  (5.67to8.82) | -3.86  (-3.71to-4.01) | 947.01  (775.49to1092.18) | 374.81  (298.6to454.35) | -3.31  (-3.19to-3.43) |
| Male | 26.15  (20.77to30.96) | 9.23  (6.93to11.62) | -3.73  (-3.63to-3.84) | 1135.85  (927.3to1330.08) | 451.14  (349.38to555.53) | -3.31  (-3.21to-3.41) |
| Female | 15.85  (10.34to19.85) | 5.06  (3.72to6.63) | -4.04  (-3.77to-4.31) | 753.24  (542.5to919.15) | 298.81  (228.3to378.27) | -3.28  (-3.08to-3.48) |
| 55-59 years | Both | 42.17  (33.97to49.53) | 15.07  (12.24to18.51) | -3.65  (-3.48to-3.83) | 1610.37  (1335.56to1863.64) | 643.86  (516.71to784.7) | -3.25  (-3.11to-3.38) |
| Male | 53.33  (42.86to63.57) | 18.84  (14.54to24.02) | -3.57  (-3.43to-3.71) | 1976.3  (1615.72to2323.55) | 764.23  (600.65to959.78) | -3.26  (-3.14to-3.38) |
| Female | 30.93  (20.48to38.89) | 11.42  (8.53to14.66) | -3.76  (-3.5to-4.02) | 1242.15  (874.8to1511.54) | 527.25  (399.95to656.27) | -3.2  (-3.01to-3.39) |
| 60-64 years | Both | 87.97  (72.44to101.45) | 32.31  (26.03to39.85) | -3.57  (-3.43to-3.72) | 2792.92  (2339.07to3195.26) | 1115.94  (901.41to1367.85) | -3.27  (-3.13to-3.41) |
| Male | 113.37  (92.92to132.81) | 40.85  (31.44to52.3) | -3.61  (-3.47to-3.75) | 3517.89  (2895.32to4110.88) | 1356.1  (1056.07to1717.75) | -3.37  (-3.23to-3.51) |
| Female | 63.66  (43.96to77.29) | 24.22  (18.11to30.52) | -3.49  (-3.33to-3.66) | 2099.03  (1523.6to2500.04) | 888.87  (681.27to1096.57) | -3.1  (-2.95to-3.25) |
| 65-69 years | Both | 158.59  (131.35to181.1) | 60.93  (48.84to75.57) | -3.3  (-3.11to-3.49) | 4211.22  (3522.29to4810.86) | 1743.84  (1395.9to2160.94) | -3.03  (-2.84to-3.21) |
| Male | 208.66  (172.28to241.01) | 77.3  (59.32to98.85) | -3.38  (-3.2to-3.57) | 5419.85  (4512.04to6256.94) | 2130.32  (1656.63to2698.42) | -3.17  (-2.99to-3.35) |
| Female | 115.27  (84to138.92) | 45.93  (34.13to57.82) | -3.21  (-3.02to-3.41) | 3165.74  (2397.1to3753.35) | 1390.02  (1071.15to1722.79) | -2.86  (-2.67to-3.04) |
| 70-74 years | Both | 322.03  (268.67to365.76) | 121.52  (96.92to151.24) | -3.27  (-3.16to-3.39) | 6925.4  (5788.92to7868.06) | 2785.72  (2215.16to3461.03) | -3.04  (-2.93to-3.15) |
| Male | 416.22  (345.97to486.56) | 152.93  (117.54to193.04) | -3.4  (-3.27to-3.53) | 8797.28  (7306.08to10202.69) | 3398.9  (2650.86to4259.72) | -3.21  (-3.09to-3.34) |
| Female | 246.7  (182.54to292.1) | 93.85  (69.98to118.24) | -3.21  (-3.11to-3.3) | 5428.52  (4113.97to6397.87) | 2245.69  (1718.96to2771.09) | -2.9  (-2.81to-2.99) |
| 75-79 years | Both | 462.55  (384.26to525.2) | 202.88  (160.85to255.5) | -3.13  (-2.98to-3.28) | 7949.55  (6634.83to9051.74) | 3706.59  (2947.47to4662.12) | -2.91  (-2.77to-3.05) |
| Male | 611.36  (510.38to708.39) | 258.02  (199.93to333.38) | -3.22  (-3.05to-3.39) | 10332.45  (8634.41to11940.76) | 4567.63  (3522.22to5874.38) | -3.06  (-2.89to-3.23) |
| Female | 359.17  (265.85to427.47) | 157.15  (115.32to202.1) | -3.17  (-3.01to-3.33) | 6294.18  (4814.86to7429.62) | 2992.58  (2268.45to3819.32) | -2.87  (-2.72to-3.01) |
| 80-84 years | Both | 673.55  (559.73to768.48) | 328.12  (252.12to413.9) | -2.59  (-2.37to-2.81) | 9037.31  (7534.27to10268.36) | 4613.41  (3587.86to5799.77) | -2.42  (-2.21to-2.63) |
| Male | 889.57  (747.19to1020.7) | 411.62  (312.03to533.77) | -2.74  (-2.5to-2.98) | 11768.95  (9879.35to13431.75) | 5630.51  (4329.64to7233.36) | -2.62  (-2.38to-2.86) |
| Female | 543.66  (415.99to641.63) | 268.03  (199.06to348.48) | -2.59  (-2.37to-2.81) | 7394.88  (5779.67to8658.7) | 3881.47  (2954.98to4973.33) | -2.36  (-2.15to-2.57) |
| 85-89 years | Both | 919.94  (759.78to1059.86) | 469.77  (360.01to617.64) | -2.53  (-2.2to-2.86) | 9778.46  (8092.53to11245.24) | 5211.8  (4040.72to6747.7) | -2.37  (-2.06to-2.69) |
| Male | 1270.69  (1059.62to1461.75) | 655.45  (499.99to866.45) | -2.48  (-2.05to-2.91) | 13311.78  (11201.8to15295.68) | 7011.72  (5399.2to9161.29) | -2.4  (-1.98to-2.81) |
| Female | 743.14  (567.18to885.32) | 357.25  (256.3to479.16) | -2.77  (-2.51to-3.03) | 7997.54  (6193.41to9454.05) | 4121.02  (3056.3to5444.56) | -2.52  (-2.28to-2.76) |
| 90-94 years | Both | 991.49  (793.31to1146.9) | 534.4  (395.02to698.78) | -2.13  (-1.82to-2.43) | 9144.66  (7345.35to10591.71) | 5132.01  (3855.2to6677) | -1.99  (-1.7to-2.29) |
| Male | 1488.75  (1225.18to1730.2) | 765.96  (582.43to999.91) | -2.2  (-1.82to-2.58) | 13534  (11131.84to15695.19) | 7108.11  (5416.93to9242.28) | -2.14  (-1.76to-2.52) |
| Female | 784.61  (592.59to935.35) | 422.5  (297.49to577.49) | -2.19  (-1.92to-2.46) | 7318.63  (5565.58to8681.33) | 4177.05  (3041.84to5612.81) | -1.99  (-1.73to-2.24) |
| 95+ years | Both | 816.33  (618.11to978.2) | 498.09  (348.81to673.42) | -1.39  (-1.15to-1.64) | 7260.44  (5591.45to8684.57) | 4531.42  (3216.93to5991.17) | -1.34  (-1.09to-1.58) |
| Male | 1046.39  (808.87to1269.81) | 581.99  (431.4to742.71) | -1.49  (-1.13to-1.85) | 9234.48  (7128.44to11126.94) | 5228.34  (3982.33to6628.8) | -1.47  (-1.12to-1.82) |
| Female | 737.33  (540to888.76) | 465.87  (309.14to644.8) | -1.4  (-1.21to-1.59) | 6582.6  (4852.44to7927.81) | 4263.84  (2968.43to5850.18) | -1.32  (-1.13to-1.5) |

Abbreviations: COPD, chronic obstructive pulmonary disease; PMP, particulate matter pollution; DALY, disability-adjusted life year; EAPC, estimated annual percentage change.

**Table A.2** Global COPD burden attributable to PMP, by SDI regions for combined sexes, and its EAPC from 1990 to 2021.

| **location** | **sex** | **ASMR** | | **EAPC** | **ASDR** | | **EAPC** |
| --- | --- | --- | --- | --- | --- | --- | --- |
| **1990** | **2021** | **1990** | **2021** |
| Global | Both | 42.53  (35.33to48.43) | 18.51  (14.64to23.13) | -2.96  (-2.8to-3.12) | 877.48  (736.13to995.54) | 389.5  (312.59to484.62) | -2.87  (-2.74to-3) |
| Male | 56.28  (47.14to64.81) | 23.94  (18.29to30.95) | -3  (-2.8to-3.21) | 1116.49  (934.34to1282.3) | 477.36  (370.99to604.13) | -2.98  (-2.82to-3.14) |
| Female | 32.99  (24.71to39.09) | 14.42  (10.83to18.43) | -2.98  (-2.85to-3.12) | 693.86  (527.8to816.78) | 317.51  (248.26to395.01) | -2.8  (-2.69to-2.91) |
| High SDI | Both | 5.07  (3.45to6.89) | 1.71  (1.21to2.27) | -3.75  (-3.57to-3.92) | 112.2  (75.34to152.88) | 41.32  (29.41to54.87) | -3.4  (-3.26to-3.54) |
| Male | 8.13  (5.43to11.08) | 2.38  (1.71to3.09) | -4.15  (-4.01to-4.3) | 162.6  (107.72to220.9) | 52.54  (37.64to68.69) | -3.78  (-3.67to-3.89) |
| Female | 3.3  (2.23to4.49) | 1.25  (0.84to1.69) | -3.48  (-3.25to-3.72) | 79.26  (53.37to108.31) | 32.51  (22.62to44.14) | -3.12  (-2.94to-3.31) |
| High-middle SDI | Both | 44.45  (36.2to51.46) | 10.02  (7.56to14.03) | -5.56  (-5.16to-5.96) | 828.64  (682.78to959.91) | 189.81  (146.28to256.12) | -5.43  (-5.1to-5.76) |
| Male | 62.39  (49.34to73.8) | 14.68  (10.8to19.83) | -5.28  (-4.9to-5.67) | 1121.15  (878.27to1332.79) | 251.6  (188.47to337.46) | -5.41  (-5.09to-5.73) |
| Female | 34.06  (25.48to41.19) | 7.07  (4.92to10.32) | -5.97  (-5.53to-6.42) | 638.35  (491.19to763.47) | 146.9  (109.11to208.87) | -5.51  (-5.14to-5.87) |
| Middle SDI | Both | 83.58  (70.28to95.68) | 22.39  (16.03to31.49) | -4.61  (-4.33to-4.89) | 1562.84  (1327.22to1777.94) | 416.1  (304.58to578.43) | -4.6  (-4.36to-4.83) |
| Male | 97.87  (82.34to113.45) | 29.63  (21.07to42.74) | -4.15  (-3.82to-4.48) | 1813.01  (1514.33to2118.89) | 520.55  (373.71to732.76) | -4.3  (-4.02to-4.58) |
| Female | 71.99  (54.91to85.23) | 16.96  (11.21to24.61) | -5.12  (-4.88to-5.36) | 1345.53  (1032.15to1604.23) | 331.39  (228.46to467.72) | -4.93  (-4.74to-5.12) |
| Low-middle SDI | Both | 64.94  (50.78to77.94) | 51.4  (41.61to60.84) | -0.61  (-0.46to-0.75) | 1379.76  (1099.12to1620.99) | 1030.36  (844.29to1201.46) | -0.87  (-0.75to-0.98) |
| Male | 78.52  (58.99to94.05) | 60.35  (46.9to73.85) | -0.77  (-0.61to-0.93) | 1649.64  (1253.08to1957.31) | 1205.1  (940.54to1455.28) | -0.99  (-0.85to-1.12) |
| Female | 51.49  (32.24to67.23) | 43.57  (32.31to53.76) | -0.3  (-0.14to-0.47) | 1106.36  (743.64to1403.53) | 872.41  (656.55to1059.64) | -0.62  (-0.51to-0.73) |
| Low SDI | Both | 56.34  (44.2to68.11) | 49.85  (41.51to57.52) | -0.19  (-0.02to-0.36) | 1206.64  (957.74to1427.49) | 1021.71  (856.62to1172.94) | -0.47  (-0.37to-0.56) |
| Male | 65.67  (45.06to80.21) | 55.3  (43.38to65.67) | -0.37  (-0.22to-0.52) | 1369.52  (968.01to1644.27) | 1119.34  (882.58to1321.05) | -0.6  (-0.51to-0.68) |
| Female | 47.58  (29.84to62.9) | 45.03  (34.87to57.02) | 0.05  (0.26to-0.15) | 1045.64  (706.87to1337.13) | 931.46  (736.16to1143.53) | -0.27  (-0.16to-0.38) |

Abbreviations: COPD, chronic obstructive pulmonary disease; PMP, particulate matter pollution; DALY, disability-adjusted life year; ASMR, age-standardized death rate; ASDR, age-standardized DALY rate; SDI, socio-demographic index; EAPC, estimated annual percentage change.

**Table A.3** COPD deaths and DALYs, ASMR, and ASDR attributable to PMP, by different countries and territories, and its EAPC from 1990 to 2021.

| **Location** | **Deaths**  **No. × 103(95% UI)** | | **ASMR per 100,000**  **No. (95% UI)** | | **EAPC**  **No. (95% CI)**  **1990-2021** | **DALYs**  **No. × 103 (95% UI)** | | **ASDR per 100,000**  **No. (95% UI)** | | **EAPC**  **No. (95% CI)**  **1990-2021** |
| --- | --- | --- | --- | --- | --- | --- | --- | --- | --- | --- |
| **1990** | **2021** | **1990** | **2021** | **1990** | **2021** | **1990** | **2021** |
| Afghanistan | 2.53  (1.55to3.39) | 2.53  (1.8to3.35) | 44.28  (26.45to58.9) | 34.17  (24.16to45.07) | -0.96  (-0.72to-1.21) | 66.12  (43.93to87.65) | 72.41  (54.11to94.21) | 1003.8  (662.32to1314.64) | 771.68  (573.52to1027.38) | -1.01  (-0.77to-1.25) |
| Albania | 0.4  (0.29to0.5) | 0.13  (0.07to0.27) | 24.59  (17.78to30.52) | 3.08  (1.63to6.58) | -7.19  (-6.87to-7.5) | 8.4  (6.04to10.25) | 2.9  (1.56to6.14) | 458.95  (331.4to560.51) | 67.38  (36.15to142.27) | -6.66  (-6.37to-6.95) |
| Algeria | 0.39  (0.26to0.57) | 1.17  (0.78to1.71) | 5.58  (3.65to8.07) | 4.87  (3.2to7.08) | -0.25  (-0.14to-0.35) | 11.68  (7.87to16.38) | 33.51  (22.82to46.81) | 113.95  (76.74to162.61) | 106.36  (72.5to147.31) | -0.3  (-0.14to-0.46) |
| American Samoa | 0  (0to0) | 0  (0to0) | 3.84  (0to17.17) | 2.71  (0.22to9.85) | -1.52  (-1.26to-1.77) | 0.01  (0to0.07) | 0.02  (0to0.08) | 74.89  (0to340.5) | 54.66  (4.64to194.17) | -1.4  (-1.16to-1.65) |
| Andorra | 0  (0to0) | 0  (0to0) | 4.62  (1.77to8.96) | 1.03  (0.52to1.69) | -4.62  (-4.26to-4.98) | 0.05  (0.02to0.1) | 0.04  (0.02to0.06) | 92.87  (35.75to173.64) | 22.56  (11.79to35.58) | -4.39  (-4.05to-4.74) |
| Angola | 0.93  (0.64to1.23) | 0.95  (0.54to1.48) | 34.33  (23.52to45.18) | 12.08  (6.73to18.6) | -3.95  (-3.65to-4.26) | 27.4  (19.9to35.37) | 30.19  (17.69to44.89) | 772.85  (562.32to992.76) | 283.63  (162.67to420.18) | -3.79  (-3.51to-4.08) |
| Antigua and Barbuda | 0  (0to0) | 0  (0to0) | 0.93  (0.19to2.23) | 1.27  (0.48to2.42) | 1.03  (1.29to0.77) | 0.01  (0to0.03) | 0.03  (0.01to0.06) | 22.14  (4.45to52.73) | 29.17  (10.84to55.24) | 0.89  (1.1to0.67) |
| Argentina | 1.61  (0.72to2.84) | 1.75  (0.89to2.89) | 5.39  (2.42to9.54) | 3  (1.53to4.96) | -2.06  (-1.79to-2.33) | 35.07  (15.71to62.38) | 33.59  (17.22to55.25) | 111.28  (49.91to197.07) | 59.04  (30.26to97.11) | -2.23  (-2.02to-2.43) |
| Armenia | 0.37  (0.22to0.54) | 0.2  (0.13to0.28) | 16.02  (9.61to22.99) | 4.59  (3.06to6.56) | -3.92  (-3.19to-4.63) | 8.72  (5.21to12.54) | 4.39  (2.95to6.24) | 336.58  (201.93to482.26) | 101.64  (68.26to143.96) | -4.04  (-3.49to-4.58) |
| Australia | 0.26  (0.01to0.75) | 0.59  (0.35to0.85) | 1.33  (0.04to3.8) | 1.14  (0.69to1.64) | -1.04  (-0.32to-1.77) | 5.49  (0.16to15.79) | 10.84  (6.5to15.62) | 27.53  (0.78to79.09) | 22.71  (13.57to32.65) | -1.2  (-0.5to-1.89) |
| Austria | 0.42  (0.21to0.72) | 0.28  (0.2to0.38) | 3.35  (1.65to5.72) | 1.36  (0.95to1.8) | -2.75  (-2.43to-3.07) | 9.49  (4.61to15.76) | 6.13  (4.33to8.17) | 78.36  (38.06to129.84) | 32.73  (23.09to43.55) | -2.71  (-2.43to-3) |
| Azerbaijan | 0.41  (0.16to0.76) | 0.25  (0.12to0.43) | 9.89  (3.93to18.17) | 3.14  (1.48to5.37) | -4.99  (-4.48to-5.51) | 10.41  (4.08to18.9) | 7.07  (3.51to12.27) | 217.48  (85.81to393.4) | 75.61  (37.73to129.73) | -4.9  (-4.35to-5.44) |
| Bahamas | 0  (0to0) | 0.01  (0to0.01) | 1.41  (0.22to3.2) | 1.64  (0.52to3.5) | 0.23  (0.47to-0.02) | 0.05  (0.01to0.11) | 0.15  (0.05to0.31) | 33.62  (5.28to74.79) | 37.63  (12to79.57) | 0.16  (0.38to-0.06) |
| Bahrain | 0.03  (0.02to0.04) | 0.07  (0.05to0.09) | 32.63  (25.01to40.8) | 16.62  (12.93to21.08) | -2.55  (-2.03to-3.06) | 0.86  (0.66to1.07) | 2.12  (1.63to2.69) | 609.49  (474.73to753.94) | 317.09  (247.07to396.3) | -2.53  (-2.1to-2.95) |
| Bangladesh | 30.18  (22.66to38.21) | 48.68  (36.39to64.66) | 74.2  (55.83to94.23) | 40.89  (30.7to54.9) | -2.15  (-1.8to-2.51) | 741.27  (570.83to909.29) | 1165.57  (890.99to1477.49) | 1653  (1272.6to2049.24) | 887.69  (683.64to1119.42) | -2.1  (-1.86to-2.33) |
| Barbados | 0  (0to0.01) | 0.01  (0to0.01) | 1.36  (0.3to3.24) | 1.53  (0.59to2.81) | 0.28  (0.47to0.09) | 0.09  (0.02to0.21) | 0.18  (0.07to0.33) | 30.61  (6.67to70.06) | 34.64  (13.35to62.63) | 0.37  (0.53to0.2) |
| Belarus | 1.86  (0.94to2.89) | 0.17  (0.12to0.23) | 14.97  (7.54to23.34) | 1.03  (0.71to1.41) | -9.99  (-9.25to-10.73) | 38.8  (19.75to60.3) | 5.13  (3.51to6.95) | 302.21  (153.79to469.72) | 32.36  (22.24to43.65) | -8.46  (-7.84to-9.08) |
| Belgium | 1.13  (0.53to1.91) | 0.49  (0.34to0.66) | 7.02  (3.3to11.84) | 1.79  (1.23to2.4) | -4.56  (-4.2to-4.92) | 22.14  (10.34to37.35) | 9.6  (6.56to13) | 140.79  (65.42to237.21) | 39.61  (27.22to53.49) | -4.25  (-3.91to-4.58) |
| Belize | 0  (0to0.01) | 0.02  (0.01to0.03) | 5.4  (3.21to7.87) | 5.85  (2.62to9.84) | -0.01  (0.58to-0.6) | 0.11  (0.07to0.16) | 0.36  (0.16to0.61) | 121.21  (72.95to175.62) | 125.36  (55.64to214.17) | -0.09  (0.41to-0.59) |
| Benin | 0.46  (0.34to0.58) | 0.7  (0.51to0.93) | 26.56  (19.58to32.98) | 17.3  (12.73to22.93) | -1.16  (-0.93to-1.38) | 11.79  (9.21to14.51) | 21.69  (16.86to27.54) | 603.25  (468.74to738.03) | 426.68  (332.2to542.71) | -0.94  (-0.73to-1.14) |
| Bermuda | 0  (0to0) | 0  (0to0) | 0.72  (0to1.92) | 0.32  (0.06to0.64) | -3.51  (-2.94to-4.06) | 0.01  (0to0.02) | 0.01  (0to0.02) | 15.09  (0to40.37) | 7.31  (1.38to14.58) | -3.24  (-2.74to-3.74) |
| Bhutan | 0.13  (0.09to0.18) | 0.16  (0.1to0.25) | 78.92  (52.83to109.26) | 30.72  (19.69to46.34) | -3.48  (-3.21to-3.74) | 3.52  (2.41to4.68) | 3.33  (2.15to4.98) | 1655.35  (1147.45to2212.74) | 586.14  (379.59to872.82) | -3.79  (-3.53to-4.04) |
| Bolivia (Plurinational State of) | 0.56  (0.41to0.72) | 0.6  (0.35to0.91) | 23.54  (17.38to29.97) | 8.75  (5.16to13.02) | -3.2  (-2.92to-3.48) | 12.3  (9.29to15.51) | 12.36  (7.27to18.57) | 433.47  (328.09to546.58) | 155.4  (91.56to231.77) | -3.41  (-3.15to-3.66) |
| Bosnia and Herzegovina | 0.71  (0.6to0.82) | 0.34  (0.21to0.59) | 21.1  (17.72to24.33) | 5.27  (3.32to9.11) | -5  (-4.79to-5.22) | 17.76  (14.97to20.36) | 8.16  (5.24to13.92) | 465.65  (390.52to532.13) | 129.65  (83.04to221.53) | -4.6  (-4.44to-4.77) |
| Botswana | 0.15  (0.08to0.22) | 0.08  (0.04to0.19) | 35.32  (18.72to52.75) | 7.62  (3.98to17) | -4.73  (-4.54to-4.92) | 3.88  (2.13to5.67) | 2.44  (1.32to5.31) | 760.34  (425.08to1109.74) | 180.54  (98.6to393.28) | -4.5  (-4.34to-4.66) |
| Brazil | 9.73  (5.27to14.77) | 7.92  (4.22to12.81) | 14.01  (7.6to21.31) | 3.29  (1.76to5.33) | -5.19  (-4.88to-5.51) | 218.54  (120.21to331.42) | 170.55  (92.12to276.67) | 269.26  (148.35to406.7) | 68.94  (37.25to111.92) | -4.97  (-4.65to-5.28) |
| Brunei Darussalam | 0  (0to0.01) | 0  (0to0.01) | 3.33  (0.22to8.88) | 1.54  (0.33to3.1) | -1.87  (-1.11to-2.62) | 0.05  (0to0.14) | 0.07  (0.02to0.15) | 59.32  (4.01to156.49) | 27.23  (5.74to54.35) | -2.13  (-1.41to-2.84) |
| Bulgaria | 0.93  (0.48to1.52) | 0.38  (0.26to0.65) | 9.24  (4.86to15.26) | 2.55  (1.79to4.43) | -4.36  (-4.04to-4.69) | 22.85  (11.97to37.33) | 9.18  (6.46to15.81) | 196.93  (103.11to322.62) | 65.44  (46.24to112.46) | -3.76  (-3.45to-4.06) |
| Burkina Faso | 0.55  (0.43to0.7) | 0.96  (0.74to1.2) | 16.75  (12.94to21.02) | 13.33  (10.39to16.86) | -0.64  (-0.57to-0.71) | 16.77  (13.59to20.15) | 31.57  (25.22to37.86) | 408.7  (328.42to498.25) | 348.44  (277.79to418.36) | -0.45  (-0.38to-0.51) |
| Burundi | 0.83  (0.58to1.05) | 0.97  (0.66to1.28) | 43  (30.28to54.21) | 27.52  (18.98to36.35) | -1.88  (-1.67to-2.09) | 21.27  (15.3to26.7) | 29.1  (21.09to36.45) | 947.28  (684.06to1179.73) | 633.21  (463.4to799.97) | -1.72  (-1.52to-1.92) |
| Cabo Verde | 0.06  (0.05to0.07) | 0.03  (0.02to0.04) | 25.47  (20.5to31.11) | 6.91  (4.65to9.64) | -4.26  (-3.47to-5.05) | 1.25  (1.03to1.5) | 0.72  (0.49to0.97) | 537.09  (442.79to647.44) | 163.19  (111.48to221.57) | -3.86  (-3.22to-4.5) |
| Cambodia | 1.25  (0.92to1.55) | 2.68  (1.98to3.4) | 38.33  (28.16to47.28) | 30.45  (22.87to38.05) | -0.79  (-0.74to-0.85) | 32.71  (24.79to39.7) | 66.75  (50.59to83.43) | 806.16  (611.58to975.62) | 612.43  (467.81to749.55) | -0.96  (-0.9to-1.02) |
| Cameroon | 0.9  (0.69to1.13) | 1.58  (1.17to2.11) | 26.79  (20.32to33.46) | 16.6  (12.47to22.24) | -1.37  (-1.23to-1.5) | 24.73  (19.89to30.07) | 50.92  (40.13to64.9) | 591.63  (470.99to718.74) | 409.18  (320.87to520.54) | -1.06  (-0.95to-1.17) |
| Canada | 0.62  (0.15to1.21) | 0.4  (0.15to0.72) | 1.87  (0.47to3.68) | 0.49  (0.18to0.88) | -4.65  (-4.2to-5.09) | 12.9  (3.17to24.97) | 8.01  (2.96to14.29) | 38.96  (9.58to75.32) | 10.48  (3.87to18.69) | -4.55  (-4.1to-4.99) |
| Central African Republic | 0.4  (0.25to0.53) | 0.62  (0.36to0.9) | 49.02  (29.97to65.96) | 40.91  (23.23to61.51) | -0.62  (-0.58to-0.66) | 11.6  (7.77to15.04) | 19.34  (12.71to27.1) | 1101.74  (725.44to1430.2) | 947.55  (606.93to1335.02) | -0.55  (-0.51to-0.59) |
| Chad | 0.6  (0.41to0.77) | 0.99  (0.67to1.32) | 24.61  (16.75to31.36) | 22.3  (15.39to29.34) | -0.14  (-0.04to-0.24) | 15.91  (11.74to19.65) | 30.8  (22.73to39.03) | 576.75  (426.08to711.74) | 544.91  (400.76to687.17) | -0.04  (0.04to-0.12) |
| Chile | 0.92  (0.58to1.19) | 0.89  (0.57to1.32) | 10.56  (6.59to13.58) | 3.37  (2.16to4.99) | -3.2  (-2.86to-3.54) | 19.45  (12.34to25.06) | 15.38  (10.01to22.91) | 203.63  (128.7to262.56) | 58.93  (38.31to87.75) | -3.65  (-3.38to-3.92) |
| China | 867.87  (718.82to997.27) | 497.05  (353.98to710.52) | 162.33  (134.83to187.21) | 28.22  (20.03to40.2) | -6.11  (-5.73to-6.49) | 18160.92  (15246.03to20961.27) | 9157.67  (6641.94to12975.63) | 2692.65  (2254.61to3082.2) | 473.09  (343.34to670.23) | -6.04  (-5.7to-6.37) |
| Colombia | 2.13  (1.18to3) | 2.46  (1.44to4.4) | 14.54  (8.08to20.51) | 4.29  (2.53to7.72) | -4.47  (-4.06to-4.87) | 48.25  (26.52to68.12) | 43.83  (25.75to77.02) | 295.18  (162.94to416.61) | 78.4  (46.16to137.52) | -4.84  (-4.43to-5.24) |
| Comoros | 0.04  (0.03to0.06) | 0.07  (0.05to0.1) | 30.35  (20.31to41.17) | 17.8  (12.04to24.36) | -1.95  (-1.7to-2.2) | 1.21  (0.86to1.63) | 1.91  (1.38to2.5) | 664.32  (469.23to889.78) | 411.62  (297.69to537.55) | -1.77  (-1.53to-2.01) |
| Congo | 0.31  (0.19to0.45) | 0.35  (0.22to0.52) | 40  (24.41to57.59) | 19.12  (11.51to27.23) | -2.74  (-2.56to-2.92) | 8.49  (5.5to11.87) | 10.62  (6.61to14.86) | 865.7  (561.18to1205.35) | 432.62  (264.41to609.07) | -2.62  (-2.44to-2.79) |
| Cook Islands | 0  (0to0) | 0  (0to0) | 3.83  (0.13to15.01) | 0.81  (0to2.27) | -5.2  (-4.68to-5.72) | 0.01  (0to0.03) | 0  (0to0.01) | 75.22  (2.49to289.25) | 17.27  (0to47.64) | -4.9  (-4.37to-5.42) |
| Costa Rica | 0.13  (0.06to0.2) | 0.13  (0.08to0.22) | 8.24  (4.01to12.89) | 2.35  (1.5to3.91) | -4.09  (-3.49to-4.68) | 2.61  (1.26to4.11) | 2.49  (1.61to4.2) | 155.97  (75.62to245.56) | 44.86  (28.95to75.71) | -4.12  (-3.63to-4.6) |
| Cote d'Ivoire | 0.71  (0.55to0.9) | 1.34  (0.98to1.77) | 26.06  (20.13to32.12) | 16.52  (12.19to21.46) | -1.29  (-1.15to-1.42) | 22.23  (17.55to27.21) | 45.22  (34.76to57.06) | 587.76  (464.32to722.93) | 410.99  (318.48to518.37) | -1.03  (-0.91to-1.14) |
| Croatia | 0.25  (0.13to0.44) | 0.27  (0.19to0.38) | 4.69  (2.35to8.21) | 2.65  (1.91to3.73) | -1.65  (-1.37to-1.94) | 6.37  (3.24to11.09) | 5.37  (3.88to7.55) | 109.01  (55.57to190.57) | 56.75  (41.17to79.28) | -1.91  (-1.62to-2.2) |
| Cuba | 0.33  (0.12to0.64) | 0.87  (0.42to1.47) | 3.43  (1.21to6.59) | 4.21  (2.05to7.08) | 0.6  (0.89to0.31) | 7.72  (2.73to14.94) | 18.39  (8.74to31.11) | 76.07  (26.9to146.75) | 92.91  (44.11to157.04) | 0.51  (0.81to0.21) |
| Cyprus | 0.05  (0.02to0.09) | 0.06  (0.04to0.08) | 10.27  (4.39to18.96) | 3.38  (2.44to4.66) | -3.92  (-3.68to-4.15) | 0.98  (0.43to1.76) | 1.08  (0.77to1.45) | 156.39  (68.12to282.37) | 56.62  (40.32to76.32) | -3.6  (-3.4to-3.8) |
| Czechia | 0.62  (0.32to1.03) | 0.46  (0.34to0.61) | 4.52  (2.31to7.49) | 1.95  (1.43to2.58) | -0.89  (-0.21to-1.57) | 15.16  (7.69to25.41) | 10.68  (7.91to14.01) | 110.8  (56.22to185.53) | 48.48  (35.91to63.54) | -1.26  (-0.74to-1.78) |
| Democratic People's Republic of Korea | 12.4  (8.6to17.03) | 21.26  (15.11to29.49) | 114.57  (78.98to162.66) | 75.81  (53.65to109.2) | -1.32  (-1.19to-1.45) | 265.63  (190.24to344.26) | 422.68  (307.59to547.86) | 2020.56  (1446.7to2703.22) | 1379.05  (1009.15to1830.59) | -1.23  (-1.1to-1.36) |
| Democratic Republic of the Congo | 4.02  (2.66to5.75) | 8.77  (5.32to14.16) | 37.69  (25.35to54.32) | 34.15  (20.61to57.26) | -0.35  (-0.3to-0.39) | 113.6  (78.86to155.04) | 253.98  (167.42to363.22) | 813.54  (575.19to1120.28) | 765.66  (503.8to1138.68) | -0.21  (-0.17to-0.26) |
| Denmark | 0.47  (0.19to0.84) | 0.31  (0.19to0.46) | 5.46  (2.25to9.75) | 2.31  (1.38to3.36) | -3.28  (-2.84to-3.73) | 10.27  (4.28to18.43) | 5.58  (3.35to8.12) | 125.97  (52.47to226.07) | 44.29  (26.55to64.38) | -3.91  (-3.5to-4.31) |
| Djibouti | 0.02  (0.01to0.02) | 0.04  (0.02to0.06) | 18.38  (12.22to25.14) | 9.32  (5.33to14.86) | -2.3  (-2to-2.6) | 0.5  (0.34to0.67) | 1.36  (0.83to2.01) | 407.69  (279.62to548.5) | 228.18  (136.4to341.64) | -2  (-1.72to-2.28) |
| Dominica | 0  (0to0.01) | 0  (0to0.01) | 7.39  (3.65to11.22) | 3.55  (1.49to6.44) | -2.18  (-1.88to-2.48) | 0.09  (0.04to0.13) | 0.06  (0.03to0.11) | 148.03  (71.85to221.48) | 73.62  (30.63to135.32) | -2.04  (-1.7to-2.37) |
| Dominican Republic | 0.19  (0.11to0.28) | 0.23  (0.07to0.48) | 7.04  (3.99to9.81) | 2.38  (0.74to4.97) | -2.97  (-2.66to-3.28) | 4.5  (2.45to6.28) | 5.23  (1.69to10.27) | 134.72  (74.08to187.99) | 53  (17.08to104.06) | -2.68  (-2.36to-3) |
| Ecuador | 0.56  (0.35to0.75) | 0.42  (0.23to0.65) | 13.09  (8.13to17.61) | 3.03  (1.71to4.65) | -4.59  (-4.07to-5.11) | 10.54  (6.5to14.1) | 7.67  (4.47to11.9) | 219.68  (135.15to293.86) | 50.73  (29.64to78.49) | -4.8  (-4.3to-5.29) |
| Egypt | 4.46  (3.26to5.7) | 5.37  (3.89to7.02) | 23.55  (17.3to30.22) | 13.05  (9.41to16.73) | -2.07  (-1.85to-2.28) | 120.7  (89.25to152.93) | 166.58  (123.02to214.34) | 489.45  (360.36to618) | 299.99  (221.04to384.87) | -1.86  (-1.65to-2.07) |
| El Salvador | 0.42  (0.33to0.51) | 0.3  (0.16to0.48) | 15.21  (12.1to18.48) | 4.3  (2.28to6.93) | -4.11  (-3.82to-4.39) | 8.54  (6.82to10.24) | 5.68  (3.02to8.85) | 297.42  (236.66to355.81) | 87.05  (46.24to135.97) | -4.06  (-3.8to-4.32) |
| Equatorial Guinea | 0.06  (0.04to0.08) | 0.03  (0.01to0.05) | 40.77  (26.61to55.28) | 7.27  (3.5to12.34) | -6.45  (-5.55to-7.33) | 1.65  (1.12to2.18) | 0.83  (0.42to1.38) | 918.02  (630.21to1206.14) | 174.2  (89.8to289.22) | -6.24  (-5.33to-7.15) |
| Eritrea | 0.28  (0.19to0.37) | 0.47  (0.34to0.62) | 36.15  (22.98to48.72) | 24.41  (18.16to31.85) | -1.23  (-1.13to-1.33) | 9.05  (6.64to11.46) | 14.63  (11.07to19.11) | 842.77  (591.17to1081.66) | 559.14  (423.46to714.8) | -1.31  (-1.21to-1.41) |
| Estonia | 0.03  (0.01to0.07) | 0.01  (0to0.02) | 1.65  (0.59to3.45) | 0.23  (0.07to0.48) | -7.26  (-6.88to-7.65) | 0.88  (0.32to1.83) | 0.18  (0.05to0.37) | 42.93  (15.46to89.95) | 6.33  (1.86to13.23) | -7.04  (-6.66to-7.42) |
| Eswatini | 0.09  (0.06to0.13) | 0.09  (0.04to0.17) | 42.34  (25.82to58.52) | 20.03  (8.9to37.6) | -1.93  (-1.45to-2.4) | 2.45  (1.57to3.3) | 2.61  (1.23to4.87) | 924.98  (591.4to1243.93) | 478.93  (222.22to885.6) | -1.75  (-1.26to-2.23) |
| Ethiopia | 5.09  (3.6to6.4) | 6.25  (4.81to7.71) | 32.65  (22.62to41.33) | 18.09  (14.11to22.19) | -2.25  (-2.13to-2.37) | 151.82  (110.64to185.5) | 183.55  (144.7to217.13) | 787.68  (579.94to962.43) | 435.38  (346.19to516.18) | -2.26  (-2.13to-2.38) |
| Fiji | 0.07  (0.04to0.1) | 0.04  (0.01to0.09) | 29.46  (14.5to43.34) | 8.49  (2.24to18.2) | -4.48  (-4.15to-4.8) | 1.89  (0.98to2.76) | 1.12  (0.3to2.37) | 597.96  (304.68to867) | 169.83  (44.35to357.32) | -4.39  (-4.13to-4.64) |
| Finland | 0.06  (0.01to0.12) | 0.03  (0to0.06) | 0.76  (0.13to1.68) | 0.17  (0.02to0.37) | -5.3  (-4.74to-5.85) | 1.42  (0.23to3.04) | 0.58  (0.08to1.28) | 19.71  (3.14to42.29) | 4.4  (0.63to9.59) | -5.34  (-4.8to-5.87) |
| France | 2.65  (1.17to4.7) | 1.13  (0.74to1.57) | 2.92  (1.29to5.17) | 0.6  (0.4to0.84) | -5.5  (-5.18to-5.81) | 47.12  (20.45to81.64) | 21.4  (13.95to29.84) | 54.34  (23.57to94) | 14.01  (9.2to19.56) | -4.65  (-4.41to-4.88) |
| Gabon | 0.07  (0.03to0.13) | 0.05  (0.03to0.09) | 13.88  (6.65to26.6) | 6.78  (3.49to11.71) | -2.27  (-2.11to-2.42) | 1.6  (0.8to3.04) | 1.52  (0.84to2.51) | 296.26  (148to560.53) | 158  (85.44to258.81) | -1.97  (-1.81to-2.12) |
| Gambia | 0.07  (0.05to0.09) | 0.17  (0.12to0.24) | 26.07  (18.97to32.66) | 22.14  (15.08to30.1) | -0.34  (-0.08to-0.59) | 2.05  (1.57to2.55) | 5.09  (3.83to6.6) | 602.06  (457.66to748.26) | 529.11  (392.58to685.42) | -0.29  (-0.07to-0.51) |
| Georgia | 0.15  (0.05to0.3) | 0.16  (0.08to0.29) | 2.72  (0.96to5.36) | 2.45  (1.29to4.45) | 0.85  (1.98to-0.26) | 4.19  (1.48to8.1) | 3.95  (2.05to7.24) | 69.54  (24.61to134.21) | 65.61  (34.21to120.06) | 0.06  (1.12to-0.99) |
| Germany | 5.79  (2.75to9.8) | 3.12  (2.1to4.2) | 4.28  (2.03to7.22) | 1.41  (0.96to1.89) | -3.2  (-2.92to-3.48) | 125.65  (58.67to214.6) | 66.69  (45.29to90.99) | 96.82  (45.17to164.83) | 33.92  (23.12to46.18) | -3.08  (-2.84to-3.32) |
| Ghana | 0.5  (0.39to0.62) | 1.14  (0.86to1.48) | 10.81  (8.69to13.43) | 8.97  (6.78to11.55) | -0.15  (0.17to-0.47) | 17.78  (14.52to21.21) | 43.75  (33.77to53.91) | 291.03  (237.57to347.35) | 261.93  (205.76to324.74) | 0.06  (0.35to-0.22) |
| Greece | 0.46  (0.22to0.78) | 0.62  (0.46to0.8) | 3.18  (1.52to5.42) | 1.87  (1.38to2.39) | -1.28  (-0.29to-2.26) | 11.64  (5.52to20.09) | 12.61  (9.33to16.25) | 78.51  (37.41to135.82) | 46.9  (34.66to60.5) | -1.37  (-0.66to-2.08) |
| Greenland | 0  (0to0) | 0  (0to0) | 3.64  (0.02to10.24) | 1.3  (0.05to3.51) | -3.77  (-3.35to-4.19) | 0.02  (0to0.06) | 0.02  (0to0.05) | 73.3  (0.32to205.74) | 27.33  (1.08to74.91) | -3.65  (-3.23to-4.06) |
| Grenada | 0  (0to0.01) | 0  (0to0.01) | 4.23  (2.14to6.42) | 2.92  (1.1to5.54) | -1.27  (-0.95to-1.58) | 0.07  (0.04to0.11) | 0.07  (0.03to0.14) | 96.96  (49.86to147.5) | 66  (25.08to126.21) | -1.2  (-0.96to-1.44) |
| Guam | 0  (0to0) | 0  (0to0) | 2.61  (0to7.25) | 0.94  (0.45to1.51) | -2.76  (-1.94to-3.58) | 0.03  (0to0.09) | 0.06  (0.03to0.09) | 49.76  (0to140.94) | 27.54  (13.98to44.83) | -1.57  (-0.84to-2.3) |
| Guatemala | 0.39  (0.31to0.46) | 0.69  (0.38to1.06) | 18.06  (14.48to21.02) | 7.7  (4.23to11.7) | -2.62  (-2.36to-2.89) | 9.26  (7.31to10.83) | 15.12  (8.26to22.89) | 325.97  (258.48to380.36) | 149.06  (81.72to224.76) | -2.54  (-2.3to-2.78) |
| Guinea | 0.71  (0.48to0.93) | 0.96  (0.68to1.29) | 25.32  (17.14to33.54) | 20.8  (14.78to27.57) | -0.27  (-0.1to-0.44) | 18.4  (13.23to23.27) | 28.2  (21.3to35.67) | 575.12  (415.66to722.64) | 509.2  (384.67to654.16) | -0.08  (0.06to-0.23) |
| Guinea-Bissau | 0.12  (0.08to0.15) | 0.14  (0.09to0.18) | 37.26  (26.75to48.11) | 26.19  (16.9to33.69) | -0.78  (-0.56to-1.01) | 3.38  (2.53to4.29) | 4.6  (3.34to5.88) | 870.98  (648.54to1101.56) | 634.04  (445.35to798.08) | -0.72  (-0.51to-0.93) |
| Guyana | 0.01  (0.01to0.02) | 0.02  (0.01to0.03) | 4.57  (3.05to6.52) | 3.67  (1.53to6.32) | -0.88  (-0.56to-1.2) | 0.36  (0.24to0.52) | 0.54  (0.23to0.94) | 100.62  (67.52to144.06) | 86.07  (36.68to149.79) | -0.64  (-0.38to-0.9) |
| Haiti | 0.7  (0.29to1.01) | 1.35  (0.55to2.12) | 28.18  (12.06to41.32) | 25.17  (10.85to38.21) | -0.23  (-0.16to-0.3) | 17.48  (8.01to24.79) | 33.93  (15.68to52.9) | 586.25  (270.03to829.32) | 516.6  (240.75to787.02) | -0.29  (-0.23to-0.35) |
| Honduras | 0.48  (0.37to0.62) | 1.44  (0.98to2) | 30.01  (23.24to39.72) | 29.53  (19.88to40.88) | 0.18  (0.47to-0.11) | 11.1  (8.77to14.2) | 31.1  (20.65to42.77) | 583.67  (460.89to750.73) | 545.15  (367.55to742.57) | 0.02  (0.26to-0.22) |
| Hungary | 1.31  (0.64to2.48) | 0.78  (0.55to1.39) | 9.42  (4.61to17.82) | 3.8  (2.69to6.79) | -2.48  (-2.01to-2.95) | 29.78  (14.54to56.33) | 18.24  (12.88to32.23) | 207.99  (101.27to392.17) | 96.21  (68.07to169.95) | -2.16  (-1.77to-2.55) |
| Iceland | 0  (0to0.01) | 0  (0to0) | 0.86  (0.06to2.08) | 0.3  (0.06to0.68) | -3.56  (-3.05to-4.07) | 0.06  (0to0.15) | 0.04  (0.01to0.1) | 21.01  (1.6to49.56) | 7.13  (1.32to15.73) | -3.83  (-3.3to-4.36) |
| India | 290.92  (219.56to353.99) | 651.9  (531.63to778.2) | 85.38  (64.81to104.98) | 65.95  (53.39to79.06) | -0.6  (-0.39to-0.81) | 7317.75  (5603.96to8687.95) | 14540.06  (11973.48to17162.07) | 1781.42  (1374.14to2127.21) | 1313.33  (1074.19to1555.35) | -0.87  (-0.75to-1) |
| Indonesia | 24.99  (18.04to30.76) | 25.26  (15.49to39.37) | 34.16  (24.1to42.18) | 14.74  (9.05to22.7) | -2.72  (-2.27to-3.17) | 652.38  (491.67to787.32) | 653.29  (411.02to1013.48) | 726.44  (538.7to884.81) | 305.92  (190.34to472.97) | -2.79  (-2.38to-3.2) |
| Iran (Islamic Republic of) | 1.22  (0.9to1.56) | 3.38  (2.64to4.1) | 6.82  (5.06to8.64) | 5.15  (4.02to6.26) | -0.43  (-0.22to-0.63) | 36.27  (27.38to45.99) | 91.59  (72.54to111.86) | 153.29  (116.4to194.13) | 123.12  (97.08to150.4) | -0.29  (-0.1to-0.48) |
| Iraq | 0.35  (0.23to0.49) | 0.66  (0.45to0.96) | 4.86  (3.15to6.82) | 3.8  (2.53to5.53) | -1.1  (-0.94to-1.27) | 10.81  (7.48to14.44) | 23.45  (16.33to31.99) | 134.77  (92.84to179.4) | 105.04  (72.96to144.2) | -0.88  (-0.74to-1.03) |
| Ireland | 0.25  (0.09to0.46) | 0.09  (0.04to0.14) | 6.07  (2.2to11.4) | 1.05  (0.52to1.64) | -5.85  (-5.6to-6.1) | 4.77  (1.72to8.79) | 1.67  (0.83to2.63) | 114.33  (41.09to211.14) | 20.3  (10.07to31.95) | -5.81  (-5.59to-6.02) |
| Israel | 0.23  (0.12to0.38) | 0.29  (0.21to0.36) | 5.05  (2.56to8.43) | 2.09  (1.53to2.6) | -2.79  (-2.55to-3.03) | 4.8  (2.44to7.9) | 6.38  (4.81to8.05) | 100.74  (51.08to166.11) | 50.16  (37.84to63.45) | -2.26  (-2.05to-2.47) |
| Italy | 4.82  (2.43to7.84) | 3.35  (2.39to4.32) | 5.33  (2.68to8.72) | 1.66  (1.2to2.12) | -3.71  (-3.52to-3.9) | 96.27  (47.88to154.46) | 56.76  (42.05to72.75) | 106.33  (52.76to170.53) | 33.34  (24.85to42.68) | -3.75  (-3.59to-3.9) |
| Jamaica | 0.1  (0.05to0.14) | 0.09  (0.05to0.16) | 5.21  (2.71to7.59) | 2.92  (1.41to4.93) | -1.75  (-1.45to-2.05) | 2.18  (1.11to3.17) | 2.08  (1.02to3.46) | 120.5  (61.05to174.95) | 66.37  (32.55to110.71) | -1.8  (-1.54to-2.07) |
| Japan | 2  (0.39to4.33) | 3.32  (1.75to5.19) | 1.29  (0.25to2.79) | 0.59  (0.32to0.92) | -2.78  (-2.28to-3.28) | 46.97  (9.11to100.83) | 68.82  (37.35to106.26) | 28.74  (5.59to61.6) | 15.7  (8.53to24.31) | -2.09  (-1.72to-2.47) |
| Jordan | 0.04  (0.03to0.06) | 0.16  (0.11to0.21) | 4.52  (3.18to6.08) | 2.99  (2.17to4.07) | -1.82  (-1.46to-2.17) | 1.34  (0.98to1.77) | 5.97  (4.52to7.83) | 107.42  (77.93to140.29) | 85.47  (64.67to111.32) | -1.11  (-0.81to-1.4) |
| Kazakhstan | 1.19  (0.43to2.36) | 1.36  (0.91to1.99) | 10.64  (3.82to21.01) | 8.91  (5.94to12.96) | -1.31  (-0.55to-2.06) | 28.84  (10.29to56.9) | 33.45  (22.41to48.35) | 234.74  (84.2to464.7) | 194.19  (130.54to280.8) | -1.44  (-0.76to-2.13) |
| Kenya | 1.47  (0.82to2.38) | 3.89  (2.22to7.03) | 23.02  (12.67to38.09) | 23.43  (13.12to44.92) | 0.28  (0.42to0.13) | 38.53  (24.55to56.6) | 106.67  (68.52to171.74) | 499.01  (308.64to745.86) | 507.7  (317.27to850.98) | 0.27  (0.44to0.1) |
| Kiribati | 0.02  (0.01to0.03) | 0.02  (0.01to0.03) | 74.42  (46.82to119.92) | 45.74  (32.17to70.99) | -1.71  (-1.53to-1.9) | 0.52  (0.33to0.76) | 0.58  (0.4to0.88) | 1528.77  (978.48to2295.63) | 910.48  (647.28to1385.64) | -1.79  (-1.62to-1.96) |
| Kuwait | 0.01  (0.01to0.01) | 0.02  (0.02to0.03) | 2.63  (2.03to3.26) | 1.18  (0.89to1.51) | -2.15  (-1.47to-2.83) | 0.58  (0.44to0.71) | 2.12  (1.61to2.69) | 88.02  (67.28to108.69) | 67.67  (51.53to85.41) | -0.43  (-0.07to-0.79) |
| Kyrgyzstan | 1.25  (0.82to1.64) | 0.47  (0.33to0.61) | 47.4  (31.14to62.15) | 12.5  (8.86to16.14) | -4.99  (-4.26to-5.72) | 27.92  (18.53to36.59) | 12.23  (8.69to15.91) | 966.64  (641.26to1266.15) | 274.44  (194.32to353.43) | -4.94  (-4.2to-5.68) |
| Lao People's Democratic Republic | 1.01  (0.63to1.3) | 1.1  (0.59to1.66) | 63.14  (39.72to81.03) | 31.97  (17.36to48.81) | -2.44  (-2.25to-2.62) | 25.9  (16.94to33.32) | 27.54  (15.43to40.67) | 1346.57  (884.84to1716.49) | 660.99  (368.43to981.99) | -2.52  (-2.34to-2.7) |
| Latvia | 0.13  (0.06to0.23) | 0.03  (0.02to0.05) | 3.77  (1.78to6.3) | 0.74  (0.46to1.23) | -5.96  (-5.67to-6.24) | 3.37  (1.59to5.56) | 0.88  (0.54to1.47) | 94.04  (44.59to154.96) | 22.58  (13.97to37.55) | -5.39  (-5.12to-5.67) |
| Lebanon | 0.09  (0.05to0.14) | 0.24  (0.15to0.36) | 5.1  (2.71to7.89) | 3.58  (2.23to5.38) | -0.87  (-0.57to-1.16) | 2.28  (1.32to3.46) | 5.41  (3.56to7.81) | 112.47  (64.47to171.22) | 85.8  (56.59to123.77) | -0.63  (-0.36to-0.89) |
| Lesotho | 0.29  (0.2to0.4) | 0.37  (0.25to0.51) | 39.78  (27.29to55.74) | 41.23  (28.09to56.36) | 0.78  (1.16to0.4) | 7.18  (5.3to9.34) | 10.19  (7.27to13.64) | 885.75  (650.73to1161.96) | 972.21  (704.45to1287.37) | 0.87  (1.24to0.5) |
| Liberia | 0.24  (0.17to0.29) | 0.3  (0.21to0.42) | 25.32  (18.41to30.6) | 19.22  (13.49to26.43) | -0.81  (-0.62to-0.99) | 6.13  (4.78to7.42) | 9.66  (7.27to12.49) | 553.98  (426.37to663.67) | 464.86  (349.15to607.56) | -0.51  (-0.35to-0.67) |
| Libya | 0.09  (0.06to0.14) | 0.27  (0.17to0.41) | 5.8  (3.62to8.77) | 6.46  (4.06to9.6) | 0.89  (1.38to0.4) | 2.58  (1.67to3.83) | 8.26  (5.42to11.75) | 137.94  (89.33to205.86) | 160.81  (105.11to228.55) | 0.81  (1.23to0.39) |
| Lithuania | 0.29  (0.13to0.49) | 0.04  (0.03to0.06) | 6.37  (2.87to10.85) | 0.66  (0.4to0.97) | -7.9  (-7.62to-8.19) | 6.42  (2.95to10.96) | 1.04  (0.64to1.55) | 141.96  (65.34to242.43) | 18.33  (11.2to27.13) | -7.26  (-7to-7.51) |
| Luxembourg | 0.02  (0.01to0.04) | 0.01  (0.01to0.02) | 3.86  (1.54to6.92) | 0.96  (0.54to1.45) | -4.22  (-3.88to-4.55) | 0.45  (0.18to0.81) | 0.23  (0.13to0.34) | 82.22  (32.45to146.56) | 20.56  (11.4to31.06) | -4.29  (-3.94to-4.64) |
| Madagascar | 1.7  (1.32to2.1) | 2.82  (2.05to3.76) | 43.96  (34.28to53.89) | 39.2  (28.96to51.82) | -0.54  (-0.46to-0.62) | 42.62  (33.78to50.71) | 82.26  (61.6to106.29) | 906.14  (719.82to1086.7) | 821.95  (623.29to1060.96) | -0.48  (-0.4to-0.55) |
| Malawi | 0.69  (0.53to0.87) | 1.22  (0.94to1.52) | 23.97  (18.83to29.96) | 21.22  (16.55to26.23) | -0.61  (-0.44to-0.78) | 19.41  (15.37to23.76) | 36.27  (28.97to44.27) | 537.88  (430.28to662.57) | 506.52  (405.99to614.45) | -0.42  (-0.25to-0.59) |
| Malaysia | 0.96  (0.4to1.64) | 1.05  (0.67to1.49) | 12.21  (5.1to20.89) | 4.48  (2.85to6.35) | -4.02  (-3.6to-4.43) | 22.44  (9.28to38.25) | 25.78  (16.52to36.31) | 260.35  (107.42to444.64) | 96.66  (61.74to135.69) | -3.86  (-3.49to-4.23) |
| Maldives | 0.03  (0.02to0.04) | 0.01  (0.01to0.02) | 54.85  (31.86to72.53) | 3.96  (2.1to8.29) | -9.72  (-9.26to-10.18) | 0.89  (0.51to1.2) | 0.24  (0.13to0.49) | 1119.23  (647.27to1480.94) | 78.06  (41.93to158.52) | -9.86  (-9.39to-10.34) |
| Mali | 1.15  (0.92to1.4) | 2.22  (1.66to2.92) | 37.15  (29.76to45.85) | 32.26  (24.57to41.48) | -0.19  (-0.07to-0.31) | 32.43  (26.34to38.77) | 64.64  (50.25to82.55) | 843.82  (686.99to1013.77) | 747.08  (585.74to945.75) | -0.17  (-0.06to-0.29) |
| Malta | 0.01  (0.01to0.02) | 0.01  (0.01to0.01) | 3.4  (1.41to5.95) | 0.96  (0.67to1.29) | -4.3  (-3.96to-4.64) | 0.3  (0.12to0.52) | 0.24  (0.17to0.33) | 71.65  (29.46to124.19) | 23.88  (16.74to31.84) | -3.79  (-3.48to-4.1) |
| Marshall Islands | 0.01  (0to0.01) | 0.01  (0to0.01) | 49.74  (33.89to65.46) | 28.8  (18.89to40.38) | -1.41  (-1.21to-1.6) | 0.16  (0.11to0.21) | 0.18  (0.12to0.26) | 1021.2  (709.37to1343.67) | 585.34  (388.25to820.64) | -1.44  (-1.24to-1.63) |
| Mauritania | 0.2  (0.15to0.25) | 0.22  (0.16to0.29) | 23.72  (17.93to30.02) | 12.55  (9.26to16.5) | -1.92  (-1.55to-2.28) | 5.14  (3.9to6.36) | 6.44  (4.95to8.07) | 531.74  (406.83to658.3) | 309.39  (236.94to386.07) | -1.64  (-1.32to-1.95) |
| Mauritius | 0.02  (0.01to0.04) | 0.02  (0.01to0.03) | 3.8  (1.46to7.51) | 1.06  (0.34to1.91) | -3.99  (-3.58to-4.4) | 0.5  (0.2to0.98) | 0.42  (0.13to0.76) | 76.64  (29.74to150.6) | 24.05  (7.7to43.63) | -3.61  (-3.26to-3.95) |
| Mexico | 4.6  (2.63to6.65) | 4.51  (2.77to7.77) | 14.85  (8.53to21.52) | 4.1  (2.51to7.07) | -4.28  (-3.96to-4.61) | 91.12  (52.54to132.54) | 89.35  (55.36to153.85) | 249.11  (143.4to361.17) | 75.66  (46.84to130.42) | -4.03  (-3.72to-4.35) |
| Micronesia (Federated States of) | 0.03  (0.02to0.04) | 0.01  (0.01to0.02) | 71.9  (50.47to94.02) | 28.44  (19.01to39.9) | -3.17  (-3.1to-3.24) | 0.67  (0.46to0.87) | 0.38  (0.26to0.53) | 1445.89  (1017.75to1866.51) | 583.18  (398.28to809.89) | -3.08  (-3.02to-3.15) |
| Monaco | 0  (0to0) | 0  (0to0) | 1.02  (0.16to2.07) | 0.79  (0.39to1.24) | -0.5  (0.57to-1.56) | 0.02  (0to0.04) | 0.02  (0.01to0.03) | 24.57  (4.07to50.11) | 18.88  (9.2to29.46) | -0.59  (0.47to-1.64) |
| Mongolia | 0.23  (0.17to0.29) | 0.13  (0.07to0.21) | 25.87  (19.54to33.02) | 7.69  (4.56to12.54) | -4.9  (-4.55to-5.25) | 5.38  (4.09to6.91) | 3.43  (2.08to5.64) | 537.22  (408.81to685.23) | 167.71  (100.55to275.08) | -4.66  (-4.31to-5.01) |
| Montenegro | 0.01  (0.01to0.02) | 0.01  (0.01to0.02) | 2.02  (1.06to3.59) | 1.18  (0.71to2.64) | -2.18  (-1.88to-2.47) | 0.4  (0.21to0.7) | 0.35  (0.22to0.78) | 65.09  (33.97to114.62) | 37.33  (23.46to82.23) | -2.25  (-1.94to-2.56) |
| Morocco | 0.94  (0.54to1.35) | 1.35  (0.92to1.9) | 7.73  (4.44to10.89) | 4.73  (3.23to6.61) | -1.29  (-1.09to-1.5) | 24.96  (15.52to34.46) | 36.07  (24.7to50.51) | 179.81  (110.59to249.34) | 111.01  (77.33to153.84) | -1.33  (-1.11to-1.55) |
| Mozambique | 0.91  (0.66to1.17) | 1.68  (1.27to2.14) | 20.69  (15.03to26.65) | 20.11  (15.04to25.98) | 0.22  (0.37to0.08) | 26.36  (20.42to32.55) | 52.69  (41.19to64.65) | 473.98  (363.34to586.44) | 488.77  (385.38to599.54) | 0.38  (0.51to0.24) |
| Myanmar | 17.15  (12.4to22.33) | 24.43  (16.13to32.94) | 98.39  (71.83to127.18) | 63.87  (42.9to85.63) | -1.66  (-1.48to-1.83) | 408.81  (299.26to525.71) | 518.34  (352.66to686.86) | 1953.65  (1435.62to2493.78) | 1186.36  (806.73to1572.59) | -1.87  (-1.69to-2.06) |
| Namibia | 0.18  (0.1to0.26) | 0.17  (0.08to0.35) | 37.2  (20.84to54.27) | 15.82  (7.48to31.97) | -3.02  (-2.6to-3.44) | 4.8  (2.72to6.74) | 4.6  (2.16to9.33) | 806.93  (459.02to1137.93) | 357.86  (169.1to720.5) | -2.91  (-2.49to-3.32) |
| Nauru | 0  (0to0) | 0  (0to0) | 4.45  (0to19.44) | 3.52  (0.35to10.52) | -1.83  (-0.01to-3.62) | 0  (0to0.02) | 0  (0to0.01) | 91.06  (0to389.11) | 70.46  (7.17to202.19) | -1.92  (-0.05to-3.74) |
| Nepal | 8.84  (5.9to11.41) | 18.71  (14.4to24.01) | 126.1  (86.53to160.26) | 99.36  (77.24to128.1) | -0.61  (-0.4to-0.81) | 216.14  (145.92to279.93) | 412.65  (320.85to523.44) | 2577.27  (1777.72to3278.37) | 1922.49  (1514.26to2428.4) | -0.78  (-0.59to-0.98) |
| Netherlands | 1.35  (0.63to2.3) | 0.91  (0.62to1.21) | 6.43  (3to10.95) | 2.29  (1.57to3.04) | -3.66  (-3.38to-3.94) | 26.86  (12.33to45.84) | 16.77  (11.59to22.25) | 131.07  (60.08to223.28) | 45.45  (31.56to60.19) | -3.57  (-3.27to-3.87) |
| New Zealand | 0.05  (0to0.15) | 0.08  (0.03to0.13) | 1.26  (0.03to3.74) | 0.88  (0.36to1.45) | -1.92  (-1.57to-2.26) | 1.04  (0.02to3.1) | 1.51  (0.63to2.5) | 25.97  (0.61to77.53) | 17.17  (7.17to28.39) | -1.99  (-1.65to-2.33) |
| Nicaragua | 0.15  (0.12to0.17) | 0.36  (0.22to0.49) | 11.72  (9.44to14.15) | 8.87  (5.66to12.26) | -0.35  (0.15to-0.84) | 3.5  (2.9to4.11) | 8.08  (5.15to10.9) | 245.1  (202.01to288.41) | 180.1  (115.75to242.87) | -0.67  (-0.26to-1.07) |
| Niger | 0.55  (0.36to0.73) | 1.23  (0.83to1.69) | 27.23  (17.38to35.89) | 20.81  (13.91to28.21) | -0.53  (-0.3to-0.75) | 16.64  (11.81to21.14) | 39.47  (29.66to50.23) | 630.75  (443.53to800.06) | 505.6  (373.53to647.24) | -0.41  (-0.2to-0.62) |
| Nigeria | 6.17  (4.59to8.05) | 7.76  (5.8to9.77) | 17.21  (12.83to22.22) | 11.47  (8.61to14.3) | -1.31  (-1.2to-1.42) | 176.56  (137.81to219.17) | 262.11  (202.4to319.8) | 415.06  (323.49to516.42) | 298.51  (231.44to363.87) | -1.11  (-1.03to-1.2) |
| Niue | 0  (0to0) | 0  (0to0) | 17.7  (4.84to35.89) | 2.35  (0.22to6.84) | -7.87  (-7.22to-8.52) | 0.01  (0to0.02) | 0  (0to0) | 348.24  (97.12to712.24) | 46.85  (4.27to134.52) | -7.84  (-7.19to-8.49) |
| North Macedonia | 0.22  (0.13to0.31) | 0.15  (0.1to0.24) | 13.47  (8.12to19.19) | 5.63  (3.67to9.01) | -3.24  (-2.74to-3.74) | 5.1  (3.13to7.07) | 3.7  (2.42to5.9) | 290.77  (178.15to404.92) | 120.9  (79.5to192.58) | -3.19  (-2.79to-3.59) |
| Northern Mariana Islands | 0  (0to0) | 0  (0to0) | 4.55  (0to12.8) | 3.35  (1.57to5.72) | -0.96  (-0.43to-1.5) | 0.01  (0to0.04) | 0.03  (0.01to0.05) | 88.46  (0to245.72) | 66.34  (30.99to113.76) | -0.84  (-0.28to-1.39) |
| Norway | 0.09  (0.03to0.17) | 0.08  (0.03to0.14) | 1.16  (0.35to2.24) | 0.69  (0.26to1.2) | -2.35  (-1.71to-2.99) | 2.09  (0.61to4.01) | 1.47  (0.57to2.59) | 29.59  (8.64to56.84) | 13.85  (5.34to24.35) | -3.04  (-2.47to-3.61) |
| Oman | 0.04  (0.03to0.06) | 0.07  (0.05to0.1) | 7.51  (4.68to10.91) | 5.41  (3.72to7.5) | -0.22  (0.15to-0.59) | 1.33  (0.86to1.87) | 2.73  (1.88to3.68) | 194.43  (123.8to272.6) | 143.1  (98.22to192.5) | -0.44  (-0.22to-0.66) |
| Pakistan | 27.48  (21.06to32.79) | 39.41  (29.36to51.66) | 59.37  (45.09to71.11) | 45.22  (33.62to59.53) | -1.11  (-0.82to-1.4) | 656.43  (514.57to768.66) | 999.02  (777.77to1269.87) | 1254.28  (986.7to1468.41) | 939.21  (727.48to1193.62) | -1.13  (-0.86to-1.4) |
| Palau | 0  (0to0) | 0  (0to0) | 3.63  (0.02to10.09) | 3.05  (0.27to6.51) | -0.05  (0.84to-0.93) | 0.01  (0to0.02) | 0.01  (0to0.02) | 70.66  (0.31to196.61) | 56.58  (5.07to121.3) | -0.26  (0.62to-1.14) |
| Palestine | 0.06  (0.04to0.08) | 0.08  (0.05to0.11) | 8.48  (5.68to11.83) | 4.49  (3.02to6.49) | -2.19  (-1.87to-2.51) | 1.42  (1to1.95) | 2.47  (1.67to3.52) | 176.84  (123.84to240.85) | 107.74  (74.1to153.42) | -1.68  (-1.45to-1.91) |
| Panama | 0.08  (0.04to0.12) | 0.07  (0.04to0.12) | 5.94  (2.83to9.35) | 1.53  (0.8to2.7) | -4.95  (-4.39to-5.5) | 1.71  (0.81to2.68) | 1.37  (0.73to2.42) | 120.48  (57.12to188.39) | 30.59  (16.18to53.91) | -5  (-4.53to-5.46) |
| Papua New Guinea | 1.58  (1.13to2.11) | 3.48  (2.52to4.52) | 134.17  (97.07to175.1) | 106.04  (77.11to136.03) | -0.72  (-0.68to-0.75) | 41.12  (29.14to54.92) | 86.54  (62.64to111.98) | 2630.12  (1901.68to3439.28) | 2015.1  (1497.62to2565.92) | -0.83  (-0.79to-0.86) |
| Paraguay | 0.16  (0.08to0.23) | 0.18  (0.05to0.47) | 8.36  (4.29to11.86) | 3.41  (0.89to8.81) | -2.72  (-2.31to-3.12) | 3.59  (1.84to5) | 3.91  (1.01to9.71) | 169.22  (86.44to236.6) | 70.01  (18.18to173.96) | -2.82  (-2.38to-3.25) |
| Peru | 0.89  (0.64to1.13) | 0.94  (0.57to1.52) | 8.52  (6.07to10.8) | 2.82  (1.7to4.56) | -3.69  (-3.3to-4.07) | 20.02  (14.96to24.74) | 19.78  (12.15to30.58) | 174.38  (130.12to215.89) | 59.13  (36.15to91.61) | -3.67  (-3.31to-4.02) |
| Philippines | 5.74  (4.63to6.72) | 9.36  (6.11to13.13) | 29.74  (24.09to34.88) | 14.16  (9.24to19.84) | -2.22  (-2.02to-2.42) | 154.69  (126.16to182.27) | 263.21  (174.06to368.17) | 606.69  (490.97to715.06) | 340.62  (225.09to475.39) | -1.81  (-1.58to-2.03) |
| Poland | 3.98  (2.23to5.88) | 1.51  (1.14to2.15) | 9.41  (5.28to13.86) | 1.96  (1.48to2.79) | -4.71  (-4.41to-5.02) | 96.79  (54.85to142.43) | 39.97  (30.17to55.77) | 221.75  (125.75to326.05) | 54.93  (41.45to77) | -4.23  (-3.96to-4.5) |
| Portugal | 0.44  (0.16to0.83) | 0.27  (0.14to0.42) | 3.45  (1.26to6.54) | 0.82  (0.45to1.28) | -4.8  (-4.11to-5.48) | 9.35  (3.38to17.67) | 4.44  (2.42to6.88) | 69.33  (25.13to130.99) | 15.96  (8.69to24.8) | -4.89  (-4.29to-5.48) |
| Puerto Rico | 0.03  (0to0.09) | 0.05  (0.01to0.09) | 0.78  (0to2.57) | 0.52  (0.14to0.96) | -2.29  (-1.69to-2.89) | 0.51  (0to1.67) | 0.83  (0.22to1.51) | 14.47  (0to47.37) | 10.71  (2.87to19.73) | -1.83  (-1.26to-2.4) |
| Qatar | 0.01  (0.01to0.01) | 0.03  (0.02to0.04) | 17.28  (13.11to21.8) | 7.18  (5.21to9.62) | -3.28  (-2.6to-3.96) | 0.35  (0.27to0.43) | 1.76  (1.33to2.23) | 352.54  (272.75to439.95) | 186.27  (141.14to233.9) | -2.22  (-1.76to-2.68) |
| Republic of Korea | 1.26  (0.5to2.3) | 2.54  (1.58to3.72) | 6.81  (2.69to12.48) | 2.79  (1.74to4.12) | -3.14  (-2.86to-3.41) | 30.42  (13.02to54.37) | 61.61  (40.71to88.09) | 128.38  (53.41to231.2) | 66.54  (43.98to95.07) | -2.16  (-1.94to-2.38) |
| Republic of Moldova | 0.98  (0.73to1.16) | 0.15  (0.09to0.21) | 25.71  (19.47to30.65) | 2.43  (1.51to3.5) | -8.74  (-7.99to-9.49) | 23.99  (18.16to28.91) | 3.89  (2.39to5.63) | 562.88  (426.77to677.51) | 65.81  (40.44to95.37) | -8.11  (-7.47to-8.75) |
| Romania | 4.19  (2.01to7.33) | 0.92  (0.65to1.48) | 17.65  (8.39to30.78) | 2.34  (1.65to3.76) | -6.84  (-6.56to-7.12) | 90.34  (43.19to158.49) | 22.24  (15.58to35.62) | 342.42  (163.78to601.17) | 61.15  (42.91to97.91) | -5.88  (-5.65to-6.12) |
| Russian Federation | 11.84  (5.06to19.62) | 2.93  (1.64to4.6) | 7.17  (3.07to11.89) | 1.21  (0.67to1.89) | -6.65  (-6.2to-7.1) | 285.76  (122.17to479.81) | 76  (42.33to117.63) | 161.23  (68.99to270.77) | 32.03  (17.88to49.48) | -6.18  (-5.76to-6.61) |
| Rwanda | 1.01  (0.71to1.27) | 1.16  (0.78to1.6) | 47.15  (33.26to59.79) | 25.14  (17.03to34.22) | -2.9  (-2.56to-3.24) | 27.74  (20.22to34.26) | 34.2  (25.27to44.89) | 1034.5  (759.19to1275.8) | 577.19  (422.47to761.94) | -2.75  (-2.42to-3.09) |
| Saint Kitts and Nevis | 0  (0to0) | 0  (0to0) | 1.32  (0.28to3.14) | 0.76  (0.27to1.37) | -1.6  (-1.15to-2.06) | 0.01  (0to0.03) | 0.01  (0to0.02) | 27.33  (5.84to65.56) | 15.82  (5.66to28.1) | -1.63  (-1.18to-2.07) |
| Saint Lucia | 0.01  (0to0.01) | 0.01  (0to0.02) | 8.49  (3.86to14.24) | 4.92  (2.02to8.97) | -2.22  (-1.74to-2.7) | 0.14  (0.06to0.23) | 0.24  (0.1to0.43) | 162.67  (74.1to271.49) | 100.99  (40.9to181.45) | -1.76  (-1.36to-2.17) |
| Saint Vincent and the Grenadines | 0  (0to0) | 0  (0to0.01) | 2.36  (1.28to3.58) | 2.36  (0.87to4.38) | -0.16  (0.21to-0.53) | 0.04  (0.02to0.06) | 0.07  (0.03to0.13) | 54.23  (29.2to83.17) | 50.42  (18.77to93.48) | -0.34  (0.02to-0.7) |
| Samoa | 0.04  (0.03to0.06) | 0.04  (0.02to0.06) | 65.12  (44.26to89.69) | 34.3  (17.5to51.01) | -2.17  (-2.09to-2.24) | 0.98  (0.68to1.32) | 0.91  (0.46to1.35) | 1267.44  (882.9to1689.2) | 680.83  (347.25to1005.07) | -2.09  (-2.01to-2.17) |
| San Marino | 0  (0to0) | 0  (0to0) | 1.63  (0.58to3.1) | 0.45  (0.23to0.76) | -3.34  (-2.85to-3.82) | 0.01  (0to0.03) | 0.01  (0.01to0.02) | 37.57  (13.06to71.23) | 13.6  (7.41to21.61) | -3  (-2.62to-3.37) |
| Sao Tome and Principe | 0.03  (0.02to0.03) | 0.03  (0.02to0.03) | 46.18  (37.05to55.9) | 30.76  (21.88to39.46) | -1.21  (-0.95to-1.47) | 0.6  (0.49to0.72) | 0.69  (0.51to0.9) | 962.07  (789.4to1153.93) | 660.43  (491.6to847.39) | -1.25  (-0.97to-1.53) |
| Saudi Arabia | 0.59  (0.4to0.81) | 1.29  (0.96to1.69) | 13.41  (9.02to18.24) | 10.53  (7.91to13.83) | -0.75  (-0.59to-0.92) | 14.98  (10.33to20.29) | 47.78  (36.06to62.36) | 273.77  (188.63to372.28) | 244.8  (187.77to315.19) | -0.23  (-0.07to-0.39) |
| Senegal | 0.62  (0.48to0.77) | 1.1  (0.81to1.43) | 23.85  (18.44to29.76) | 17.83  (13.19to23.33) | -0.57  (-0.13to-1.01) | 16.91  (13.48to20.44) | 32.08  (24.97to39.99) | 544.31  (430.25to660.41) | 428.08  (333.25to531.17) | -0.43  (-0.05to-0.81) |
| Serbia | 1.19  (0.62to1.94) | 0.82  (0.56to1.4) | 13.69  (7.04to22.16) | 4.66  (3.18to7.97) | -4.09  (-3.7to-4.48) | 28.14  (14.73to45.87) | 18.69  (12.96to32.37) | 278.49  (144.79to453.85) | 111.49  (77.5to193.63) | -3.54  (-3.13to-3.95) |
| Seychelles | 0  (0to0) | 0  (0to0) | 2.45  (0.62to5.25) | 1.5  (0.51to2.76) | -2.26  (-1.9to-2.62) | 0.03  (0.01to0.07) | 0.04  (0.01to0.07) | 53.16  (13.33to114.53) | 33.78  (11.64to62.41) | -2.16  (-1.81to-2.51) |
| Sierra Leone | 0.43  (0.33to0.53) | 0.56  (0.38to0.76) | 24.73  (18.87to30.55) | 18.63  (12.54to25.1) | -0.58  (-0.41to-0.76) | 11.19  (8.85to13.53) | 17.3  (13.05to22.52) | 561.11  (444.98to681.76) | 462.84  (345.67to603.07) | -0.33  (-0.18to-0.49) |
| Singapore | 0.21  (0.08to0.39) | 0.07  (0.04to0.11) | 12.21  (4.46to22.35) | 0.87  (0.47to1.33) | -8.1  (-7.59to-8.61) | 4.51  (1.65to8.13) | 1.79  (0.95to2.78) | 229.73  (84.02to412.19) | 21.18  (11.25to32.97) | -7.31  (-6.73to-7.88) |
| Slovakia | 0.18  (0.09to0.31) | 0.13  (0.09to0.17) | 3.12  (1.58to5.23) | 1.29  (0.96to1.75) | -2.34  (-1.99to-2.69) | 4.79  (2.45to8.16) | 3.44  (2.53to4.56) | 80.5  (41.14to137.16) | 36.18  (26.62to47.95) | -2.17  (-1.85to-2.5) |
| Slovenia | 0.15  (0.08to0.27) | 0.07  (0.05to0.1) | 6.23  (3.21to10.87) | 1.33  (0.95to1.83) | -5.46  (-5.24to-5.68) | 3.39  (1.77to5.97) | 1.5  (1.08to2.06) | 137.23  (71.65to241.72) | 31.94  (22.99to43.7) | -5  (-4.84to-5.15) |
| Solomon Islands | 0.06  (0.04to0.07) | 0.11  (0.09to0.14) | 63.39  (49.61to77.22) | 47  (37.01to58.14) | -0.99  (-0.94to-1.05) | 1.52  (1.13to1.95) | 2.95  (2.31to3.68) | 1286.45  (1002.52to1591.95) | 959.56  (767.48to1179.6) | -0.96  (-0.89to-1.03) |
| Somalia | 0.69  (0.41to0.96) | 1.33  (0.78to1.91) | 42.61  (25.28to58.32) | 30.06  (17.19to43.23) | -1.1  (-1.04to-1.17) | 20.81  (13.47to28.01) | 44.68  (29.04to60.48) | 952.2  (610.82to1270.65) | 748.88  (480.75to1020.57) | -0.81  (-0.75to-0.87) |
| South Africa | 2.39  (1.58to3.39) | 3.14  (2.13to4.46) | 13.68  (9to19.64) | 8.04  (5.46to11.42) | -2.25  (-1.69to-2.8) | 66.93  (45.42to92.66) | 88.98  (60.87to126.14) | 331.49  (224.11to459.36) | 199.49  (136.61to284.53) | -2.09  (-1.63to-2.55) |
| South Sudan | 0.66  (0.41to0.95) | 0.77  (0.5to1.09) | 30.87  (19.42to44.27) | 27.38  (17.48to38.27) | -0.63  (-0.36to-0.9) | 16.45  (10.49to23.41) | 22.23  (15.55to30.07) | 667.65  (429.57to946.79) | 620.78  (429.61to840.44) | -0.5  (-0.22to-0.78) |
| Spain | 2.8  (1.15to5.1) | 1.86  (1.16to2.67) | 5.13  (2.11to9.37) | 1.38  (0.87to1.97) | -4.28  (-3.86to-4.7) | 52.81  (21.73to95.93) | 29.05  (18.47to40.92) | 95.76  (39.31to174.23) | 25.49  (16.24to35.89) | -4.32  (-3.95to-4.7) |
| Sri Lanka | 4.22  (3.44to4.91) | 3.31  (1.59to7.33) | 53.07  (42.86to61.54) | 14.34  (6.92to31.42) | -3.94  (-3.37to-4.51) | 92.88  (76.16to107.46) | 67.17  (32.75to147.4) | 977.39  (802.29to1128.85) | 264.94  (129.72to581.3) | -4.19  (-3.63to-4.74) |
| Sudan | 1.88  (0.77to3.01) | 2.3  (1.38to3.34) | 24.57  (9.96to40.94) | 14.8  (9.06to21.53) | -1.74  (-1.6to-1.89) | 52.41  (26.45to78.34) | 68.62  (45.15to94.25) | 576.99  (287.71to889.07) | 356.76  (235to486.31) | -1.67  (-1.53to-1.81) |
| Suriname | 0.02  (0.01to0.03) | 0.02  (0.01to0.05) | 6.91  (2.83to11.79) | 4.17  (1.66to7.63) | -1.94  (-1.61to-2.26) | 0.36  (0.15to0.61) | 0.6  (0.24to1.09) | 146.86  (61.67to249.52) | 95.77  (37.91to174.59) | -1.77  (-1.45to-2.1) |
| Sweden | 0.14  (0.04to0.29) | 0.09  (0.03to0.17) | 0.84  (0.22to1.72) | 0.33  (0.1to0.63) | -3.47  (-2.85to-4.09) | 3.96  (1to7.99) | 1.93  (0.56to3.61) | 25.67  (6.47to51.82) | 8.26  (2.4to15.49) | -4.12  (-3.55to-4.69) |
| Switzerland | 0.36  (0.16to0.64) | 0.16  (0.1to0.23) | 3.2  (1.43to5.63) | 0.72  (0.45to1.01) | -4.63  (-4.37to-4.89) | 8  (3.49to13.99) | 3.48  (2.18to4.98) | 74.93  (32.66to130.73) | 18.16  (11.41to26.04) | -4.45  (-4.2to-4.7) |
| Syrian Arab Republic | 0.29  (0.19to0.43) | 0.59  (0.38to0.84) | 6.91  (4.33to10.05) | 6.13  (4.09to8.64) | -0.39  (-0.11to-0.67) | 8.18  (5.26to11.43) | 16.76  (11.26to23.87) | 160.03  (102.29to223.28) | 141.07  (94.67to198.79) | -0.4  (-0.12to-0.67) |
| Taiwan (Province of China) | 0.78  (0.29to1.68) | 1.17  (0.88to1.5) | 7.36  (2.73to15.75) | 2.56  (1.93to3.28) | -3.22  (-2.81to-3.63) | 19.2  (6.91to41.03) | 22.25  (17.12to28.36) | 146.13  (52.26to311.47) | 51.08  (39.45to65.18) | -3.12  (-2.77to-3.48) |
| Tajikistan | 0.73  (0.54to0.95) | 0.63  (0.43to0.91) | 30.03  (22.05to38.88) | 15.03  (9.95to21.44) | -2.79  (-2.46to-3.13) | 17.53  (13.11to22.1) | 17.28  (12.42to23.92) | 652.92  (488.7to830.63) | 326.07  (232.69to447.45) | -2.83  (-2.54to-3.12) |
| Thailand | 9.37  (6.58to12.03) | 6.19  (4.13to8.68) | 33.26  (23.2to42.56) | 5.72  (3.82to8.02) | -6.54  (-6.12to-6.95) | 232.32  (165.65to294.72) | 140.27  (98.22to192.36) | 704.93  (498to896.48) | 131.48  (92.26to180.06) | -6.2  (-5.83to-6.58) |
| Timor-Leste | 0.08  (0.05to0.11) | 0.18  (0.09to0.29) | 44  (27.26to57.5) | 26.81  (13.84to41.99) | -2.15  (-1.87to-2.43) | 2.16  (1.39to2.8) | 4.33  (2.2to6.58) | 902.67  (588.34to1162.28) | 543.59  (279.99to834.59) | -2.22  (-1.93to-2.51) |
| Togo | 0.24  (0.18to0.29) | 0.56  (0.4to0.77) | 25.54  (19.38to30.92) | 20.19  (14.38to27.89) | -0.54  (-0.38to-0.7) | 6.97  (5.51to8.34) | 18.55  (14.03to24.17) | 585.52  (464.54to706.27) | 497.33  (375.88to647.95) | -0.33  (-0.19to-0.47) |
| Tokelau | 0  (0to0) | 0  (0to0) | 2.81  (0.25to9.5) | 1.34  (0.02to3.66) | -3.22  (-2.82to-3.62) | 0  (0to0) | 0  (0to0) | 55.9  (5.06to187.47) | 26.59  (0.33to70.59) | -3.23  (-2.84to-3.62) |
| Tonga | 0.02  (0.01to0.02) | 0.01  (0.01to0.02) | 40.22  (28.44to50.67) | 18.59  (8.41to28.07) | -2.35  (-2.19to-2.51) | 0.41  (0.29to0.52) | 0.29  (0.13to0.43) | 815.36  (578.25to1019.74) | 373.13  (170.86to551.75) | -2.4  (-2.26to-2.54) |
| Trinidad and Tobago | 0.02  (0to0.05) | 0.04  (0.01to0.09) | 2.98  (0.48to7.14) | 2.32  (0.74to4.54) | -0.82  (-0.51to-1.12) | 0.48  (0.08to1.11) | 1.06  (0.33to2.08) | 59.74  (9.95to139.81) | 54.7  (17.27to107.91) | -0.35  (-0.05to-0.64) |
| Tunisia | 0.2  (0.13to0.28) | 0.43  (0.26to0.68) | 5.28  (3.45to7.51) | 3.75  (2.22to6.01) | -1.03  (-0.87to-1.2) | 5.98  (3.96to8.59) | 12.26  (8to17.68) | 128.91  (86.05to185.63) | 96.78  (62.9to140.3) | -0.8  (-0.63to-0.96) |
| Turkiye | 4.12  (2.58to6.85) | 7.26  (5.44to9.6) | 14.68  (9.03to24.63) | 8.7  (6.53to11.49) | -1.15  (-0.65to-1.64) | 97.22  (63.71to161.08) | 161.03  (120.82to207.05) | 303.11  (196.36to501.31) | 179.68  (135.25to229.87) | -1.33  (-0.94to-1.71) |
| Turkmenistan | 0.1  (0.03to0.21) | 0.07  (0.04to0.11) | 6.55  (1.94to13.31) | 1.97  (1.08to3.13) | -4.59  (-3.78to-5.39) | 2.57  (0.76to5.21) | 2.16  (1.21to3.4) | 140.5  (41.63to285.51) | 53.56  (30.12to84.3) | -3.68  (-3to-4.36) |
| Tuvalu | 0  (0to0) | 0  (0to0) | 56.84  (38.78to74.72) | 10.2  (6.28to15.33) | -5.93  (-5.77to-6.09) | 0.07  (0.05to0.09) | 0.02  (0.01to0.03) | 1175.9  (809.46to1538.75) | 208.99  (129.93to309.59) | -5.96  (-5.81to-6.11) |
| Uganda | 1.64  (1.07to2.22) | 2.36  (1.53to3.19) | 32.7  (21.4to44.59) | 20.98  (13.5to28.33) | -1.88  (-1.73to-2.04) | 42.63  (29.5to56.12) | 70.32  (51.23to90.48) | 708.06  (488.53to927.74) | 497.13  (358.11to639.7) | -1.61  (-1.45to-1.77) |
| Ukraine | 10.3  (4.89to16.91) | 1.1  (0.59to1.79) | 15.3  (7.28to25.04) | 1.38  (0.74to2.26) | -9.48  (-8.78to-10.18) | 229.89  (108.11to374.62) | 30.48  (17.12to48.82) | 326.46  (153.49to531.74) | 39.99  (22.36to64.01) | -8.4  (-7.76to-9.04) |
| United Arab Emirates | 0.05  (0.03to0.07) | 0.15  (0.1to0.21) | 14.31  (9.65to20.42) | 9.45  (6.08to13.25) | 0.56  (1.3to-0.18) | 1.76  (1.19to2.49) | 8.54  (6.18to11.32) | 333.43  (229.33to473.59) | 211.01  (145.98to282.68) | -0.28  (0.25to-0.81) |
| United Kingdom | 5.29  (2.26to9.24) | 2.63  (1.72to3.62) | 5.39  (2.3to9.43) | 1.75  (1.14to2.4) | -3.85  (-3.59to-4.11) | 108.95  (45.6to190.88) | 51.7  (33.72to71.89) | 116.1  (48.46to203.37) | 38.02  (24.76to52.99) | -3.88  (-3.66to-4.1) |
| United Republic of Tanzania | 1.81  (1.38to2.24) | 3.12  (2.26to4.03) | 21.54  (16.45to26.36) | 15.44  (11.38to19.97) | -1.31  (-1.23to-1.38) | 50.71  (39.98to61.09) | 94.8  (72.63to118.42) | 492.66  (388.64to590.77) | 382.92  (294.79to476.61) | -1.02  (-0.96to-1.09) |
| United States of America | 10.2  (3.78to18.39) | 7.37  (3.54to11.64) | 3.01  (1.12to5.43) | 1.17  (0.56to1.84) | -3.47  (-2.91to-4.02) | 266.24  (98.43to473.93) | 172.75  (83.67to272.84) | 82.02  (30.34to146.02) | 28.87  (14.04to45.63) | -3.72  (-3.2to-4.24) |
| United States Virgin Islands | 0  (0to0) | 0  (0to0) | 0.64  (0.01to1.8) | 0.35  (0.15to0.65) | -1.91  (-1.55to-2.27) | 0.01  (0to0.03) | 0.01  (0.01to0.03) | 13.33  (0.3to37.81) | 8.25  (3.49to14.26) | -1.55  (-1.19to-1.9) |
| Uruguay | 0.18  (0.06to0.35) | 0.16  (0.06to0.29) | 4.46  (1.48to8.8) | 2.45  (0.98to4.45) | -2.26  (-2to-2.51) | 3.67  (1.2to7.24) | 2.75  (1.1to4.98) | 93.87  (30.74to185.34) | 48.06  (19.2to87.08) | -2.43  (-2.2to-2.66) |
| Uzbekistan | 1.23  (0.81to1.65) | 0.61  (0.4to0.86) | 11.74  (7.75to15.83) | 3.07  (2.03to4.34) | -5.37  (-4.57to-6.17) | 30.45  (20.7to40) | 19.89  (13.52to27.58) | 270.33  (183.37to355.19) | 82.65  (56.19to114.12) | -4.8  (-4.17to-5.43) |
| Vanuatu | 0.03  (0.02to0.05) | 0.07  (0.04to0.09) | 82.37  (50.42to110.11) | 57.18  (35.9to79.39) | -1.34  (-1.28to-1.4) | 0.93  (0.59to1.27) | 1.83  (1.17to2.49) | 1648.36  (1041.17to2200.45) | 1156.55  (746.23to1555.47) | -1.34  (-1.26to-1.41) |
| Venezuela (Bolivarian Republic of) | 0.32  (0.15to0.57) | 0.77  (0.43to1.21) | 3.89  (1.84to7) | 2.79  (1.55to4.39) | -1.14  (-0.62to-1.67) | 7.52  (3.54to13.45) | 16.72  (9.4to26.42) | 82.15  (38.47to147.49) | 57.8  (32.55to91.24) | -1.26  (-0.77to-1.76) |
| Viet Nam | 13.5  (9.7to17.16) | 14.43  (8.75to21.3) | 39.02  (28.23to49.7) | 18.02  (10.91to26.56) | -2.67  (-2.32to-3.01) | 285.46  (210.27to361.53) | 314.41  (191.37to464.38) | 753.47  (558.81to948.01) | 350.27  (214.55to518.81) | -2.62  (-2.3to-2.94) |
| Yemen | 0.93  (0.48to1.3) | 1.68  (1.13to2.34) | 24.7  (12.62to34.96) | 15.64  (10.5to21.82) | -1.52  (-1.44to-1.6) | 27.48  (16.63to36.96) | 49.03  (34.83to65.77) | 582.54  (351.88to783.71) | 361.89  (254.7to486.42) | -1.6  (-1.53to-1.67) |
| Zambia | 0.52  (0.38to0.67) | 1  (0.71to1.32) | 24.09  (17.8to30.97) | 19.35  (14.05to24.92) | -0.88  (-0.72to-1.04) | 14.51  (10.83to18.25) | 30.71  (22.96to39.1) | 544.27  (411.26to680.23) | 459.03  (345.61to577.59) | -0.79  (-0.63to-0.94) |
| Zimbabwe | 0.55  (0.41to0.7) | 0.95  (0.71to1.23) | 18.42  (13.7to23.48) | 19.06  (14.05to24.75) | 0.67  (0.96to0.38) | 15.86  (12.18to19.49) | 29.95  (23.43to37.19) | 428.87  (325.8to528.74) | 469.4  (368.42to579.81) | 0.71  (0.97to0.45) |

Abbreviations: COPD, chronic obstructive pulmonary disease; PMP, particulate matter pollution; DALY, disability-adjusted life year; ASMR, age-standardized death rate; ASDR, age-standardized DALY rate; EAPC, estimated annual percentage change.

**Table A.4** COPD deaths and DALYs, ASMR, and ASDR attributable to PMP globally, by GBD regions, and its EAPC from 1990 to 2021.

| **GBD regions** | **Deaths**  **No. × 10⁴ (95% UI)** | | **ASMR per 100,000**  **No. (95% UI)** | | **EAPC**  **No. (95% CI)**  **1990-2021** | **DALYs**  **No. × 10⁴ (95% UI)** | | **ASDR per 100,000**  **No. (95% UI)** | | **EAPC**  **No. (95% CI)**  **1990-2021** |
| --- | --- | --- | --- | --- | --- | --- | --- | --- | --- | --- |
| **1990** | **2021** | **1990** | **2021** | **1990** | **2021** | **1990** | **2021** |
| Advanced Health System | 8.62  (5.66to12.1) | 5.13  (3.56to6.82) | 5.25  (3.44to7.36) | 1.59  (1.11to2.11) | -4.19  (-4.04to-4.34) | 195.75  (128.06to271.77) | 114.33  (80.9to151.55) | 118.96  (77.87to165.02) | 39.73  (28.31to52.43) | -3.91  (-3.76to-4.06) |
| Africa | 4.91  (3.8to5.84) | 7.56  (5.99to9.15) | 22.08  (16.9to26.31) | 15.05  (11.96to18.24) | -1.31  (-1.27to-1.36) | 137.47  (108.42to162.42) | 229.98  (184.14to273.64) | 508.75  (399.72to599.87) | 366.32  (292.73to435.85) | -1.16  (-1.12to-1.2) |
| African Region | 4.08  (3.18to4.85) | 6.45  (5.07to7.92) | 23.34  (18.1to27.6) | 16.48  (12.97to20.21) | -1.2  (-1.15to-1.25) | 114.68  (91.58to134.67) | 196.2  (156.7to232.6) | 539.61  (428.79to634.17) | 400.04  (320.62to475.59) | -1.05  (-1.01to-1.09) |
| America | 3.55  (2.36to4.89) | 3.4  (2.23to5.01) | 5.94  (3.95to8.18) | 2.46  (1.61to3.62) | -3.14  (-2.8to-3.49) | 81.96  (54.07to113.66) | 72.35  (47.91to106.41) | 134.42  (88.79to186.41) | 53.41  (35.37to78.43) | -3.32  (-2.99to-3.64) |
| Andean Latin America | 0.2  (0.15to0.24) | 0.2  (0.12to0.3) | 11.65  (8.58to14.24) | 3.56  (2.19to5.37) | -3.85  (-3.47to-4.23) | 4.29  (3.24to5.18) | 3.98  (2.53to5.83) | 223.31  (168.76to270.88) | 69.58  (44.31to101.97) | -3.89  (-3.54to-4.23) |
| Asia | 133.38  (111.14to152.47) | 139.13  (110.29to173.88) | 87.25  (73.28to99.68) | 30.54  (24.06to38.36) | -3.64  (-3.48to-3.81) | 2971.95  (2516.89to3387.88) | 2947.1  (2374.98to3654.46) | 1650.92  (1391.28to1880.26) | 604.74  (486.21to750.06) | -3.47  (-3.34to-3.61) |
| Australasia | 0.03  (0to0.09) | 0.07  (0.04to0.1) | 1.32  (0.04to3.74) | 1.1  (0.64to1.59) | -1.17  (-0.52to-1.82) | 0.65  (0.02to1.85) | 1.24  (0.72to1.77) | 27.26  (0.82to77.24) | 21.84  (12.67to31.31) | -1.31  (-0.68to-1.94) |
| Basic Health System | 96.56  (80.61to110.88) | 59.84  (42.79to85.35) | 87.95  (73.14to100.89) | 18.99  (13.61to27.13) | -5.43  (-5.1to-5.77) | 2052.91  (1727.78to2362.01) | 1164.55  (852.26to1632.93) | 1587.84  (1334.79to1818.59) | 337.8  (247.32to472.87) | -5.43  (-5.14to-5.72) |
| Caribbean | 0.15  (0.09to0.21) | 0.28  (0.18to0.4) | 6.12  (3.81to8.65) | 5.21  (3.31to7.4) | -0.43  (-0.34to-0.52) | 3.54  (2.24to4.99) | 6.61  (4.27to9.35) | 138.05  (87.8to195.16) | 122.85  (79.54to173.97) | -0.34  (-0.25to-0.43) |
| Central Africa | 0.72  (0.51to0.93) | 1.34  (0.9to1.91) | 34.35  (24.69to43.41) | 27.88  (18.92to40.74) | -0.7  (-0.66to-0.75) | 19.95  (14.65to25.23) | 39.78  (28.62to52.34) | 760.53  (563.23to954.66) | 642.45  (463.58to862.48) | -0.58  (-0.54to-0.62) |
| Central Asia | 0.57  (0.35to0.81) | 0.39  (0.28to0.51) | 13.62  (8.45to19.53) | 5.72  (4.14to7.63) | -3.49  (-3.15to-3.84) | 13.6  (8.39to19.6) | 10.38  (7.58to13.75) | 298.33  (184.39to429.19) | 134.46  (98.64to178.3) | -3.39  (-3.02to-3.76) |
| Central Europe | 1.44  (0.81to2.25) | 0.61  (0.45to0.93) | 10.37  (5.77to16.16) | 2.55  (1.88to3.93) | -4.47  (-4.34to-4.61) | 33.46  (18.8to52.05) | 14.66  (10.83to22.65) | 228.14  (127.85to353.73) | 65.74  (48.48to101.7) | -4.01  (-3.86to-4.16) |
| Central Latin America | 0.87  (0.55to1.19) | 1.07  (0.7to1.73) | 13.21  (8.37to18.14) | 4.62  (3.04to7.45) | -3.55  (-3.28to-3.82) | 18.36  (11.66to25.19) | 21.37  (14.35to33.99) | 244.25  (155.16to334.58) | 88.68  (59.44to141.18) | -3.48  (-3.22to-3.75) |
| Central Sub-Saharan Africa | 0.58  (0.39to0.79) | 1.08  (0.7to1.62) | 36.83  (25.08to51.23) | 28.24  (18.24to44.56) | -0.98  (-0.92to-1.03) | 16.43  (11.57to21.73) | 31.65  (21.97to43.28) | 806.96  (573.43to1067.52) | 636.22  (443.62to907.54) | -0.89  (-0.83to-0.94) |
| Commonwealth High Income | 0.65  (0.31to1.08) | 0.39  (0.25to0.55) | 4.1  (1.94to6.76) | 1.27  (0.8to1.79) | -4.05  (-3.85to-4.26) | 13.49  (6.41to22.14) | 7.67  (4.85to10.86) | 86.36  (40.96to141.88) | 27.06  (17.08to38.41) | -4.06  (-3.88to-4.25) |
| Commonwealth Low Income | 3.82  (2.92to4.75) | 6.27  (4.87to8.2) | 52.82  (40.35to65.82) | 33.68  (26.17to43.87) | -1.63  (-1.4to-1.87) | 95.78  (76.3to115.14) | 157.78  (125.91to197.8) | 1160.75  (918.94to1410.95) | 736.62  (592.18to924.75) | -1.53  (-1.37to-1.69) |
| Commonwealth Middle Income | 33.68  (25.76to40.31) | 71.5  (58.3to84.86) | 70.18  (54.06to84.54) | 56.31  (45.6to67.44) | -0.51  (-0.33to-0.7) | 846.01  (662.81to997.32) | 1622.67  (1340.62to1909.69) | 1490.41  (1172.76to1764.68) | 1128.75  (928.87to1326.09) | -0.81  (-0.68to-0.93) |
| East Asia | 88.1  (72.92to101.12) | 51.95  (37.32to72.93) | 157.58  (130.87to182.32) | 28.21  (20.24to39.67) | -6.01  (-5.64to-6.38) | 1844.58  (1550.99to2131.05) | 960.26  (704.16to1339.75) | 2624.56  (2200.73to3007.02) | 476.45  (349.21to666.16) | -5.92  (-5.6to-6.25) |
| East Asia & Pacific - WB | 96.1  (79.89to110.33) | 61.47  (44.26to85.42) | 95.75  (79.86to110.3) | 19.98  (14.41to27.82) | -5.52  (-5.22to-5.83) | 2040.48  (1718.34to2340.45) | 1185.95  (870.17to1637.05) | 1728.11  (1449.91to1978.68) | 369.64  (270.61to508.05) | -5.4  (-5.13to-5.66) |
| Eastern Africa | 1.63  (1.19to1.96) | 2.46  (1.85to3.03) | 30.26  (21.71to36.49) | 20.01  (15.09to24.71) | -1.53  (-1.47to-1.59) | 45.5  (34.44to53.7) | 72.57  (56.58to86.77) | 685.54  (516.3to811.51) | 472.8  (368.87to565.72) | -1.4  (-1.34to-1.46) |
| Eastern Europe | 2.54  (1.21to3.99) | 0.44  (0.27to0.65) | 9.88  (4.69to15.55) | 1.23  (0.75to1.82) | -7.92  (-7.43to-8.42) | 58.91  (27.7to93.02) | 11.76  (7.21to17.53) | 214.97  (101.2to339.6) | 33.83  (20.81to50.37) | -7.18  (-6.7to-7.65) |
| Eastern Mediterranean Region | 4.2  (3.22to5.04) | 6.15  (4.91to7.55) | 29.99  (23.11to35.87) | 18.07  (14.32to22.34) | -1.89  (-1.68to-2.1) | 105.81  (82.98to124.85) | 166.9  (135.36to199.63) | 641.23  (502.06to754.87) | 402.52  (326.39to485.11) | -1.7  (-1.52to-1.87) |
| Eastern Sub-Saharan Africa | 1.74  (1.31to2.09) | 2.72  (2.12to3.3) | 30.52  (23.19to36.47) | 21.22  (16.51to25.77) | -1.36  (-1.3to-1.43) | 48.4  (37.71to56.69) | 80.61  (65.15to95.65) | 686.02  (537.02to811.42) | 499.36  (403.3to593.18) | -1.22  (-1.16to-1.28) |
| Europe | 7.13  (4.52to10.18) | 3.38  (2.43to4.47) | 6.89  (4.36to9.84) | 1.89  (1.37to2.5) | -4.52  (-4.37to-4.67) | 158.16  (101.35to225.19) | 73  (53.19to97.4) | 151.98  (97.3to216.39) | 45.14  (33.04to60.01) | -4.35  (-4.18to-4.51) |
| Europe & Central Asia - WB | 7.55  (4.83to10.69) | 3.67  (2.66to4.82) | 7.13  (4.55to10.11) | 2.02  (1.47to2.65) | -4.45  (-4.29to-4.61) | 168.35  (109.33to235.54) | 81.11  (59.46to106.97) | 157.68  (102.41to220.61) | 49.1  (36.15to64.68) | -4.24  (-4.06to-4.41) |
| European Region | 7.6  (4.86to10.75) | 3.72  (2.7to4.88) | 7.13  (4.55to10.11) | 2.03  (1.48to2.65) | -4.44  (-4.28to-4.6) | 169.37  (110.02to236.9) | 82.14  (60.38to108.24) | 157.59  (102.35to220.43) | 49.21  (36.33to64.8) | -4.23  (-4.05to-4.4) |
| High-income Asia Pacific | 0.35  (0.1to0.69) | 0.59  (0.33to0.9) | 1.95  (0.54to3.89) | 0.91  (0.52to1.38) | -2.66  (-2.27to-3.05) | 8.2  (2.32to16.24) | 13.23  (7.84to19.5) | 42.7  (11.83to84.7) | 25.86  (15.52to38.1) | -1.64  (-1.33to-1.94) |
| High-income North America | 1.08  (0.39to1.96) | 0.78  (0.37to1.23) | 2.91  (1.05to5.27) | 1.09  (0.52to1.73) | -3.56  (-3.02to-4.11) | 27.92  (10.13to49.85) | 18.08  (8.66to28.75) | 77.94  (28.33to139.2) | 26.86  (12.92to42.7) | -3.79  (-3.28to-4.3) |
| Latin America & Caribbean - WB | 2.47  (1.67to3.43) | 2.63  (1.79to3.97) | 11.22  (7.61to15.46) | 3.88  (2.64to5.85) | -3.66  (-3.42to-3.89) | 54.1  (36.86to75.24) | 54.36  (36.76to81.47) | 217.67  (148.71to301.69) | 78.3  (52.88to117.5) | -3.59  (-3.36to-3.82) |
| Limited Health System | 42.29  (32.97to50.49) | 86.02  (71.46to101.06) | 70.37  (54.93to84.31) | 54.39  (44.67to63.87) | -0.68  (-0.52to-0.83) | 1059.78  (834.77to1238.32) | 1968.91  (1640.73to2275.35) | 1480.56  (1173.14to1736.32) | 1090.9  (906.02to1261.9) | -0.92  (-0.81to-1.03) |
| Middle East & North Africa - WB | 1.01  (0.75to1.24) | 1.73  (1.38to2.1) | 10.48  (7.78to12.96) | 6.41  (5.14to7.82) | -1.58  (-1.48to-1.67) | 27.91  (21.18to34.28) | 52.44  (41.97to63.51) | 237.79  (178.37to291.26) | 158.98  (127to192.53) | -1.33  (-1.24to-1.42) |
| Minimal Health System | 1.49  (1.08to1.84) | 2.49  (1.87to3.17) | 32.32  (23.13to39.42) | 26.82  (20.01to34.31) | -0.55  (-0.52to-0.59) | 41.17  (31.18to49.65) | 74.73  (58.36to91.74) | 728.88  (548.24to883.29) | 629.17  (489.68to775.23) | -0.45  (-0.43to-0.48) |
| North Africa and Middle East | 1.83  (1.34to2.35) | 2.91  (2.34to3.51) | 32.32  (23.13to39.42) | 26.82  (20.01to34.31) | -1.66  (-1.53to-1.78) | 48.95  (37.35to62.48) | 81.92  (65.95to98.47) | 728.88  (548.24to883.29) | 629.17  (489.68to775.23) | -1.55  (-1.45to-1.65) |
| North America | 1.08  (0.39to1.96) | 0.78  (0.37to1.23) | 2.91  (1.05to5.27) | 1.09  (0.52to1.73) | -3.57  (-3.02to-4.11) | 27.91  (10.13to49.85) | 18.08  (8.66to28.74) | 77.93  (28.32to139.19) | 26.86  (12.92to42.69) | -3.79  (-3.28to-4.3) |
| Northern Africa | 0.63  (0.46to0.79) | 0.88  (0.67to1.12) | 13.28  (9.64to16.72) | 7.49  (5.67to9.54) | -1.91  (-1.79to-2.02) | 17.1  (12.78to21.39) | 26.31  (20.34to32.96) | 292.62  (216.21to364.77) | 181.97  (140.94to227.25) | -1.71  (-1.59to-1.82) |
| Oceania | 0.2  (0.14to0.26) | 0.4  (0.29to0.51) | 97.25  (73.06to124.37) | 75.8  (55.55to96.04) | -0.82  (-0.8to-0.84) | 5.16  (3.78to6.74) | 9.94  (7.27to12.68) | 1960.16  (1460.63to2520.69) | 1494.73  (1120.13to1893.97) | -0.89  (-0.86to-0.93) |
| Region of the Americas | 3.55  (2.36to4.89) | 3.4(2.23to5.01) | 5.94  (3.95to8.18) | 2.46  (1.61to3.62) | -3.14  (-2.8to-3.49) | 81.96  (54.07to113.66) | 72.35  (47.91to106.41) | 134.42  (88.79to186.41) | 53.41  (35.37to78.43) | -3.32  (-2.99to-3.64) |
| South Asia | 35.76  (27.14to42.8) | 75.89  (63.1to89.73) | 81.78  (62.51to98.19) | 62.46  (51.32to73.98) | -0.7  (-0.52to-0.87) | 893.51  (691.15to1055.11) | 1712.06  (1423.58to1994.75) | 1723.16  (1348.37to2047.23) | 1252.77  (1040.9to1459.08) | -0.95  (-0.83to-1.07) |
| South Asia - WB | 36.43  (27.75to43.55) | 76.47  (63.48to90.72) | 80.76  (61.86to96.81) | 61.35  (50.35to72.9) | -0.71  (-0.54to-0.88) | 909.5  (705.19to1073.17) | 1726.05  (1433.79to2011.46) | 1699.87  (1331.73to2017.64) | 1231.18  (1021.69to1432.95) | -0.96  (-0.84to-1.08) |
| Southeast Asia | 7.84  (6.17to9.33) | 8.81  (5.94to12.4) | 39.73  (31.08to47.55) | 16.75  (11.29to23.46) | -2.93  (-2.62to-3.23) | 191.39  (153.47to224.5) | 208.47  (142.43to292.4) | 819.51  (654.52to961.61) | 345.46  (236.32to483.84) | -2.94  (-2.66to-3.23) |
| South-East Asia Region | 39.83  (30.86to47.52) | 80.01  (65.89to94.7) | 75.25  (58.77to89.92) | 53.26  (43.55to63.07) | -0.93  (-0.76to-1.09) | 993.38  (778.25to1165.67) | 1792.79  (1482.59to2112.02) | 1572.63  (1235.96to1853.93) | 1065.01  (877.14to1250.73) | -1.16  (-1.05to-1.28) |
| Southern Africa | 0.67  (0.51to0.84) | 0.97  (0.73to1.25) | 19.29  (14.62to24.24) | 12.65  (9.51to16.38) | -1.58  (-1.25to-1.91) | 18.88  (14.56to23.04) | 28.86  (21.97to36.68) | 454.04  (347.43to561.82) | 313.3  (239.55to400.08) | -1.4  (-1.12to-1.67) |
| Southern Latin America | 0.27  (0.15to0.43) | 0.28  (0.16to0.44) | 6.35  (3.42to10.13) | 3.05  (1.73to4.85) | -2.35  (-2.13to-2.57) | 5.82  (3.14to9.27) | 5.17  (2.94to8.19) | 128.87  (69.56to205.33) | 58.07  (32.99to91.94) | -2.6  (-2.43to-2.77) |
| Southern Sub-Saharan Africa | 0.36  (0.25to0.49) | 0.48  (0.35to0.66) | 16.31  (11.23to22.12) | 9.96  (7.1to13.67) | -1.87  (-1.4to-2.33) | 10.11  (7.23to13.25) | 13.88  (10.02to18.87) | 388.26  (276.58to513.11) | 248.78  (178.72to339.51) | -1.67  (-1.28to-2.06) |
| Sub-Saharan Africa - WB | 4.3  (3.27to5.1) | 6.7  (5.28to8.21) | 24.53  (18.57to29.11) | 17.5  (13.76to21.44) | -1.17  (-1.12to-1.22) | 120.83  (95.32to142.32) | 204.18  (162.61to242.76) | 569.02  (445.04to669.12) | 424.76  (340.52to506.34) | -1.03  (-0.99to-1.07) |
| Tropical Latin America | 0.99  (0.54to1.5) | 0.81  (0.43to1.31) | 13.84  (7.52to21.03) | 3.3  (1.75to5.35) | -5.14  (-4.82to-5.45) | 22.21  (12.24to33.62) | 17.45  (9.31to28.27) | 266.56  (147.16to401.96) | 68.95  (36.83to111.83) | -4.92  (-4.6to-5.24) |
| Western Africa | 1.26  (0.97to1.55) | 1.92  (1.57to2.27) | 19.84  (15.36to24.32) | 14.36  (11.76to17.02) | -0.89  (-0.82to-0.97) | 36.05  (28.99to43.02) | 62.46  (51.24to73.27) | 470.76  (377.24to562.85) | 364.78  (299.41to426.23) | -0.72  (-0.66to-0.78) |
| Western Europe | 2.69  (1.26to4.63) | 1.58  (1.06to2.14) | 4.39  (2.06to7.57) | 1.36  (0.92to1.84) | -3.79  (-3.59to-3.99) | 54.79  (25.56to92.93) | 29.82  (20.22to40.05) | 92.15  (42.85to156.39) | 29.71  (20.25to40) | -3.68  (-3.5to-3.87) |
| Western Pacific Region | 89.62  (74.32to102.91) | 53.62  (38.43to75.63) | 103.69  (86.14to119.63) | 19.85  (14.22to28) | -5.83  (-5.51to-6.14) | 1882.43  (1583.75to2166.75) | 1009.83  (738.22to1414.84) | 1853.14  (1554.83to2126.41) | 362.28  (264.84to507.25) | -5.71  (-5.43to-5.99) |
| Western Sub-Saharan Africa | 1.43  (1.11to1.75) | 2.2  (1.8to2.63) | 20.41  (15.85to24.95) | 14.71  (12.03to17.56) | -0.9  (-0.82to-0.98) | 40.69  (32.69to48.46) | 71.35  (58.73to83.75) | 481.32  (385.58to573.48) | 372.37  (308.32to435.48) | -0.72  (-0.66to-0.78) |
| World Bank High Income | 5.53  (3.32to8.05) | 3.84  (2.61to5.23) | 4.17  (2.5to6.08) | 1.39  (0.95to1.88) | -3.64  (-3.47to-3.81) | 123.75  (75.97to178.53) | 83.61  (56.08to113.83) | 94.56  (58.21to136.4) | 34.76  (23.52to47.03) | -3.33  (-3.18to-3.47) |
| World Bank Low Income | 4.11  (3.06to5.01) | 6.59  (5to8.18) | 39.18  (29.61to47.67) | 27.43  (20.69to34.83) | -1.22  (-1.17to-1.27) | 106.75  (83.58to128.88) | 175.33  (140.29to209.89) | 808.34  (630.54to967.95) | 586.46  (466.87to709.03) | -1.12  (-1.09to-1.16) |
| World Bank Lower Middle Income | 46.58  (36to55.24) | 88.61  (72.47to105.07) | 56.92  (44.15to67.73) | 43.96  (35.67to52.2) | -0.71  (-0.56to-0.86) | 1163.25  (916.33to1356.1) | 2040.31  (1678.36to2404.19) | 1215.26  (958.34to1422.67) | 888.75  (728.86to1042.6) | -0.95  (-0.84to-1.07) |
| World Bank Upper Middle Income | 92.74  (77.07to106.55) | 54.44  (38.96to77.74) | 80.37  (66.66to92.01) | 17.43  (12.51to24.93) | -5.47  (-5.12to-5.83) | 1955.84  (1639.87to2251.44) | 1023.28  (751.44to1437.44) | 1461.63  (1222.97to1676.54) | 307.32  (226.38to431.41) | -5.51  (-5.21to-5.82) |

Abbreviations: COPD, chronic obstructive pulmonary disease; PMP, particulate matter pollution; DALY, disability-adjusted life year; ASMR, age-standardized death rate; ASDR, age-standardized DALY rate; EAPC, estimated annual percentage change.

**Table A.5** ASMR and ASDR of COPD attributable to PMP by sexes from 2021 to 2036, based on the ARIMA model.

| **Year** | **ASMR**  **No. (95% CI)** | | **ASDR**  **No. (95% CI)** | |
| --- | --- | --- | --- | --- |
| **Male** | **Female** | **Male** | **Female** |
| 2022 | 24.13  (22.78to25.49) | 14.55  (13.87to15.23) | 456.74  (434.54to478.94) | 316.94  (304.3to329.58) |
| 2023 | 23.14  (20.64to25.63) | 13.97  (12.72to15.23) | 436.13  (404.73to467.52) | 310.53  (288.18to332.88) |
| 2024 | 22.14  (18.88to25.39) | 13.4  (11.76to15.04) | 415.51  (377.06to453.96) | 301.44  (270.72to332.16) |
| 2025 | 21.14  (17.27to25.01) | 12.82  (10.87to14.77) | 394.89  (350.49to439.29) | 291.12  (253.17to329.08) |
| 2026 | 20.14  (15.74to24.54) | 12.25  (10.03to14.46) | 374.27  (324.64to423.91) | 280.25  (235.95to324.55) |
| 2027 | 19.14  (14.27to24.02) | 11.67  (9.22to14.13) | 353.66  (299.28to408.03) | 269.11  (219.15to319.08) |
| 2028 | 18.14  (12.84to23.45) | 11.1  (8.42to13.77) | 333.04  (274.31to391.77) | 257.86  (202.77to312.95) |
| 2029 | 17.15  (11.44to22.85) | 10.52  (7.65to13.39) | 312.42  (249.64to375.21) | 246.56  (186.75to306.36) |
| 2030 | 16.15  (10.07to22.22) | 9.94  (6.89to13) | 291.81  (225.21to358.4) | 235.23  (171.04to299.41) |
| 2031 | 15.15  (8.72to21.58) | 9.37  (6.13to12.61) | 271.19  (200.99to341.39) | 223.88  (155.6to292.17) |
| 2032 | 14.15  (7.39to20.91) | 8.79  (5.39to12.2) | 250.57  (176.95to324.2) | 212.54  (140.38to284.69) |
| 2033 | 13.15  (6.08to20.23) | 8.22  (4.65to11.78) | 229.96  (153.06to306.85) | 201.19  (125.36to277.02) |
| 2034 | 12.15  (4.78to19.53) | 7.64  (3.93to11.36) | 209.34  (129.3to289.38) | 189.84  (110.51to269.17) |
| 2035 | 11.16  (3.49to18.83) | 7.07  (3.2to10.93) | 188.72  (105.66to271.78) | 178.49  (95.8to261.17) |
| 2036 | 10.16  (2.21to18.11) | 6.49  (2.49to10.5) | 168.1  (82.13to254.08) | 167.14  (81.23to253.05) |

Abbreviations: COPD, chronic obstructive pulmonary disease; PMP, particulate matter pollution; DALY, disability-adjusted life year; ASMR, age-standardized death rate; ASDR, age-standardized DALY rate; CI, confidence interval.


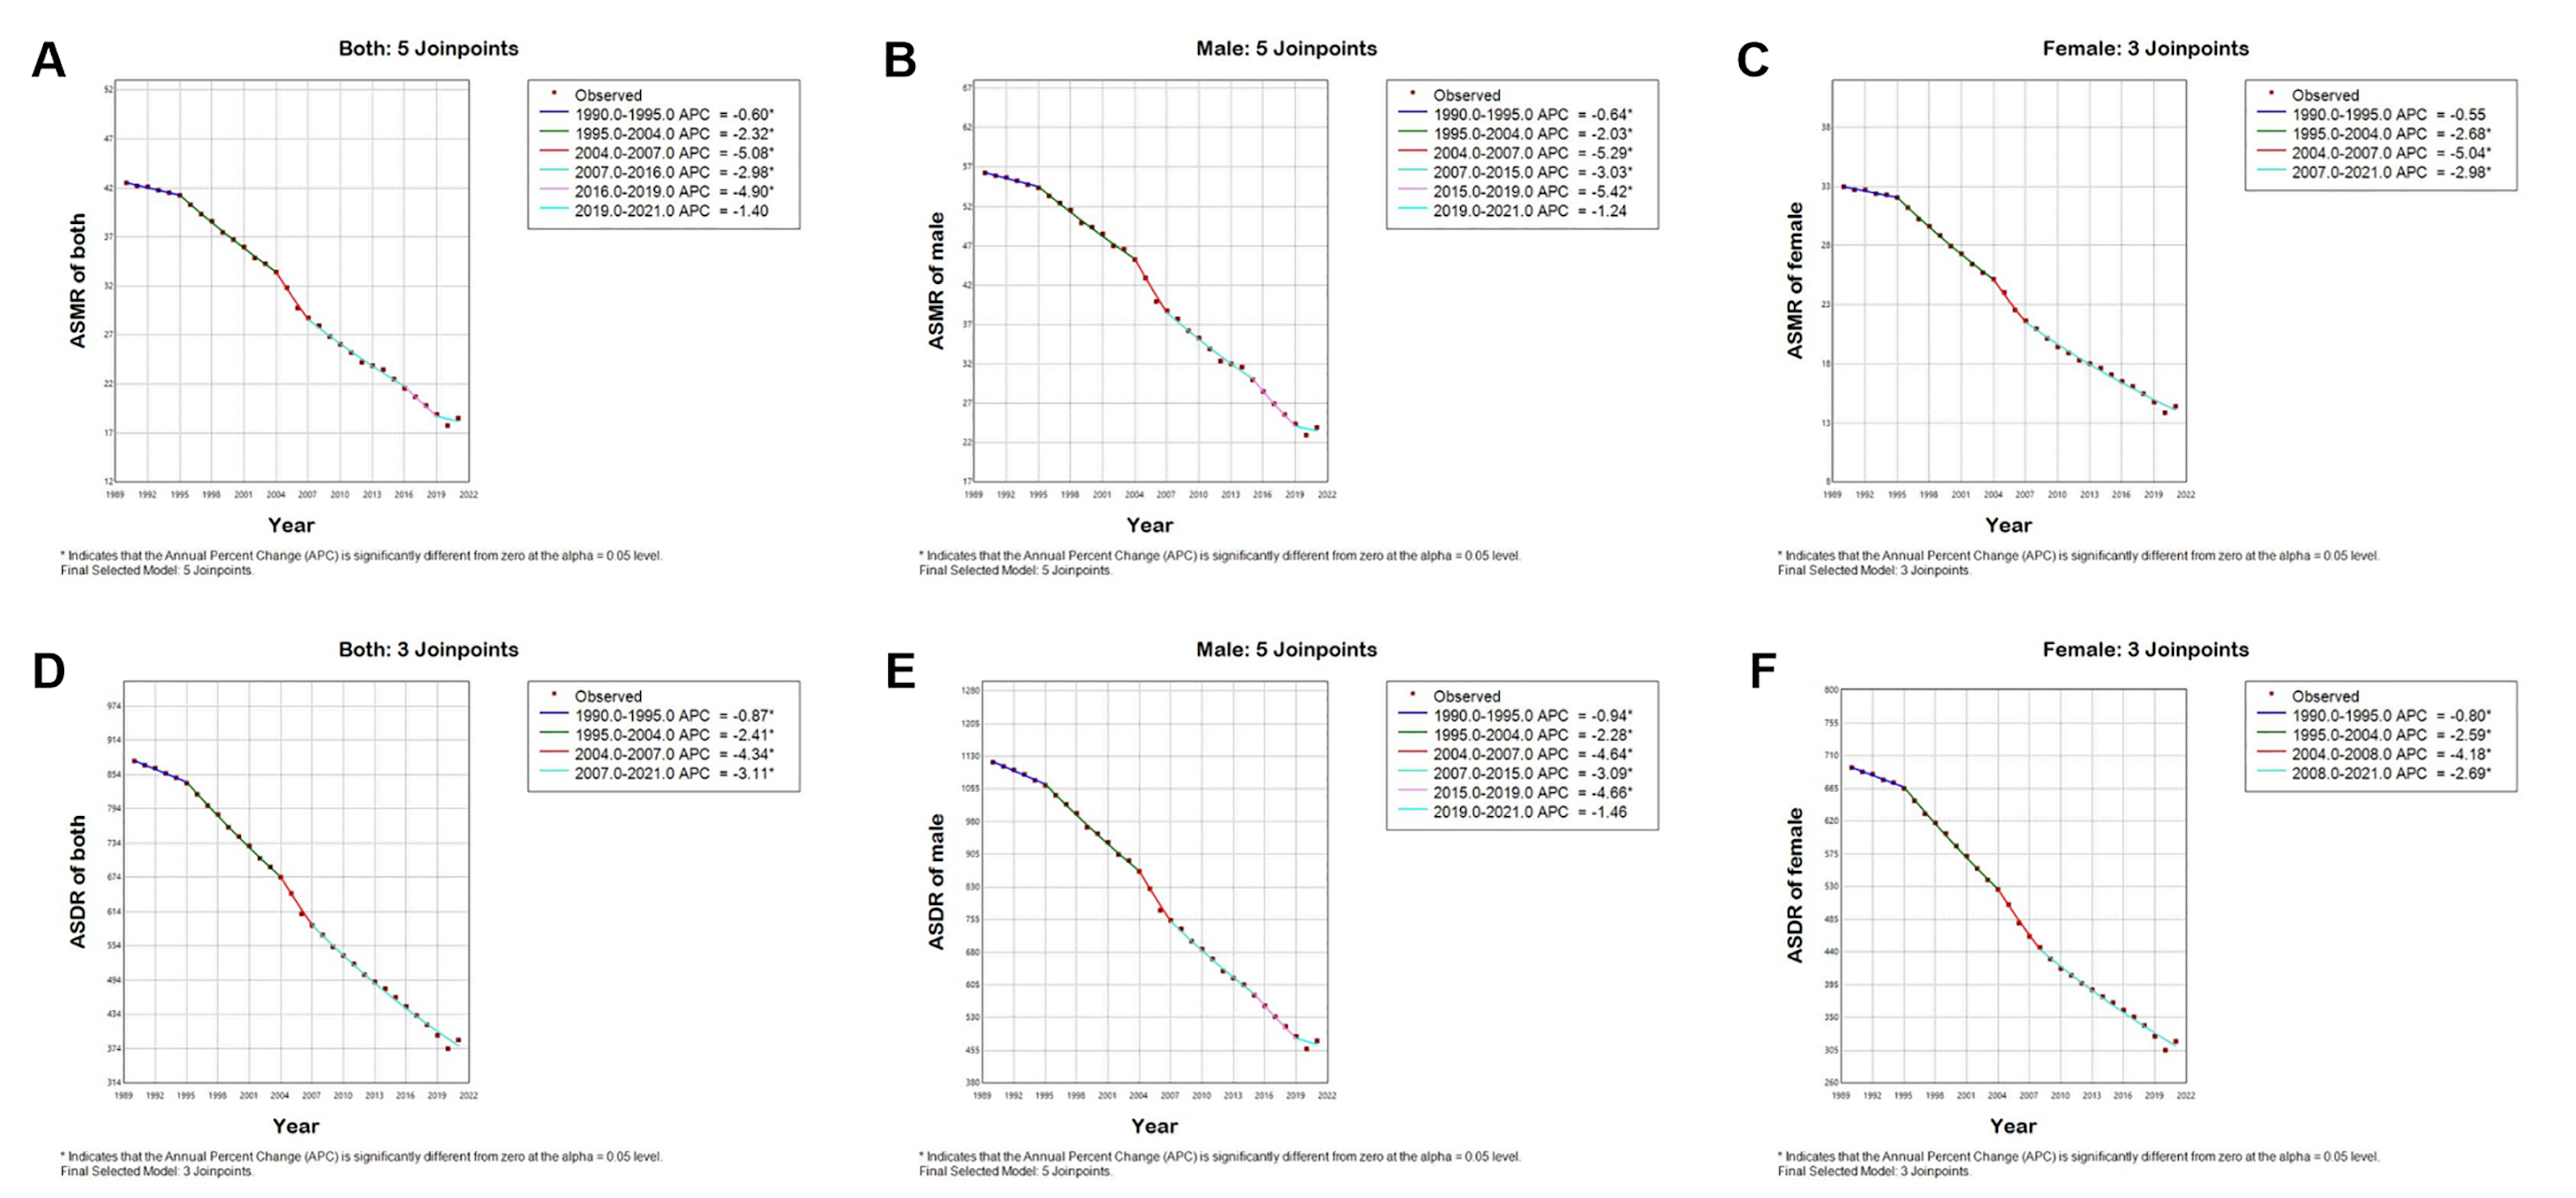


**Figure A.1** Joinpoint regression analysis of the ASMR and ASDR of COPD attributable to PM pollution at the global level and for both, males and females from 1990 to 2019. (A-C) ASMR of COPD attributable to PM pollution, (D-F) ASDR of COPD attributable to PM pollution. Abbreviations: COPD, chronic obstructive pulmonary disease; PM, particulate matter; APC, annual percentage change; DALY, disability-adjusted life year; ASMR, age-standardized death rate; ASDR, age-standardized DALY rate.


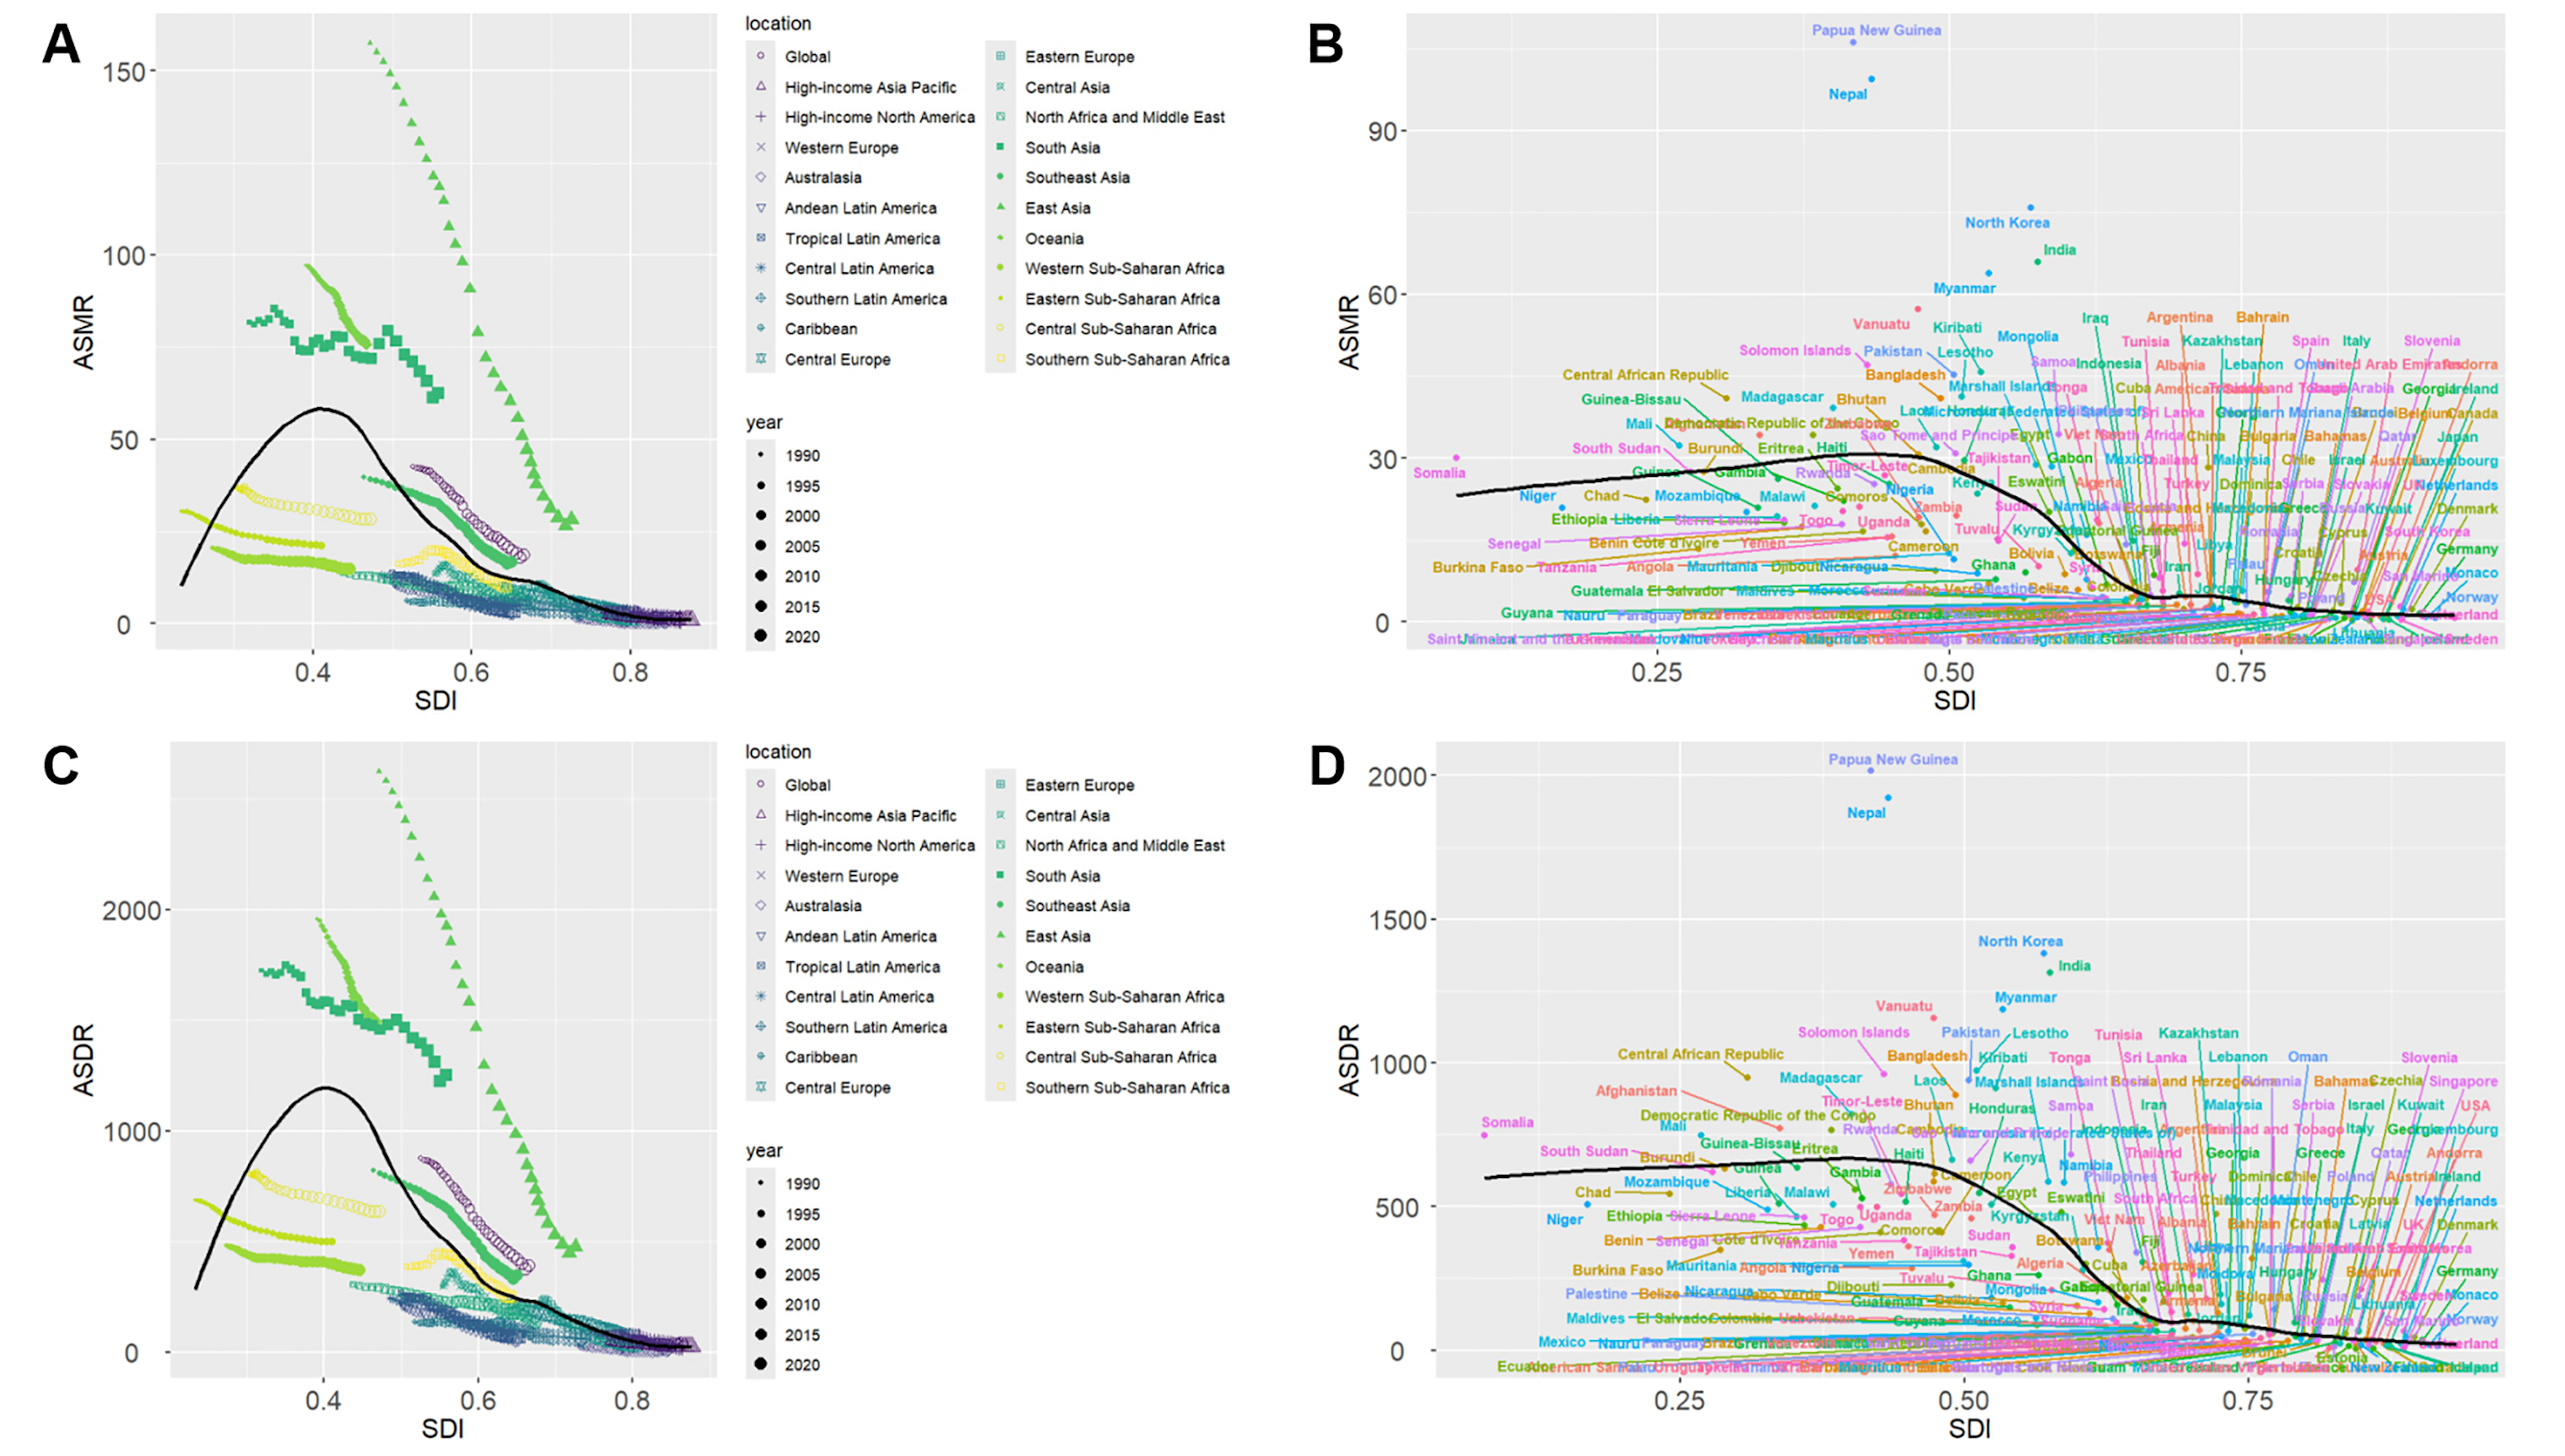


**Figure A.2** Association between the ASMR and ASDR of COPD attributed to PM pollution and SDI. (A-B) ASMR of COPD attributed to PM pollution, (C-D) ASDR of COPD attributed to PM pollution. The different symbols and colors in the figure indicate different regions or countries. The black line was an adaptive association fitted with adaptive Lesso regression based on all data points. Abbreviations: COPD, chronic obstructive pulmonary disease; PM, particulate matter; DALY, disability-adjusted life year; ASMR, age-standardized death rate; ASDR, age-standardized DALY rate; SDI, socio-demographic index.


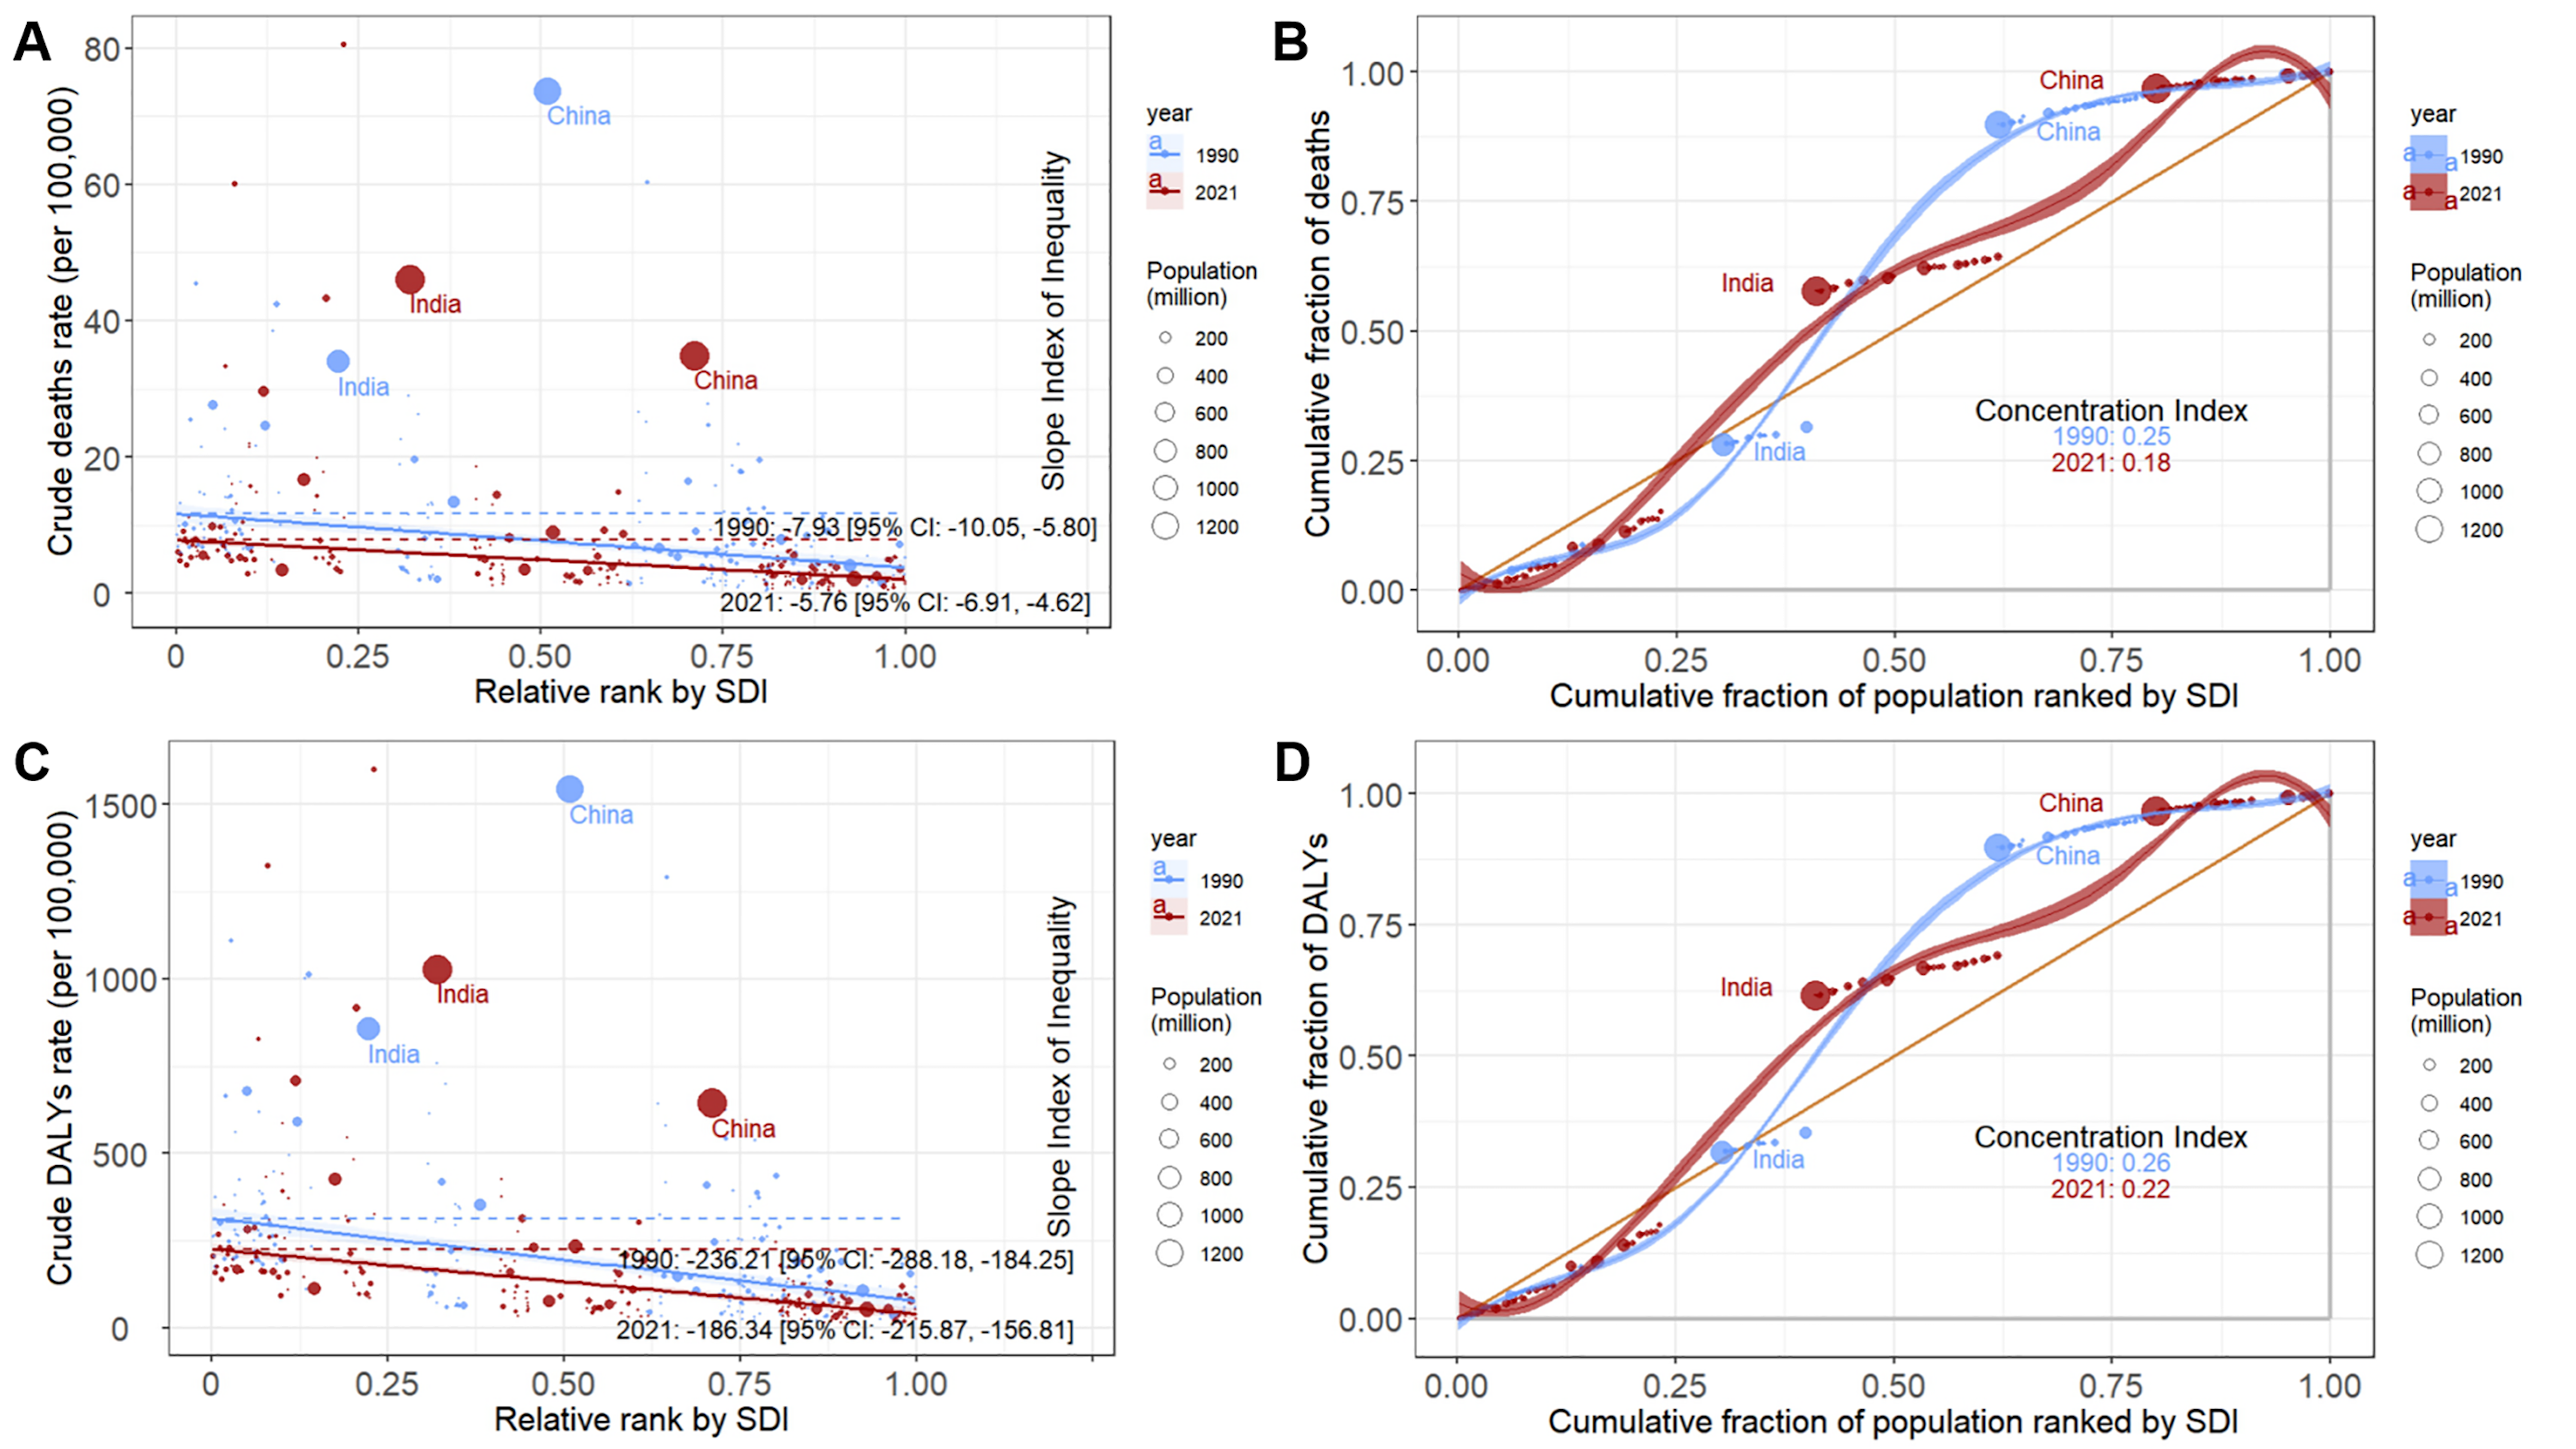


**Figure A.3** Slope indices and concentration indices for deaths and DALYs of COPD attributable to PM pollution from 1990 to 2021 worldwide. (A-B) Deaths of COPD attributable to PM pollution, (C-D) DALYs of COPD attributable to PM pollution. A and C used the regression lines to present the absolute health inequality of COPD burden caused by PM pollution related to income in 1990 and 2021. The slope in 2021 decreased compared with that in 1990 (ASMR: −7.93 and −5.76; ASDR: −236.21 and −186.34), indicating that the absolute health inequality between high-income and low-income countries decreased during this period. B and D used the concentration curve to present the relative health inequality of COPD burden caused by PM pollution related to income in 1990 and 2021. CI is the numerical integral of the area under the curve. The decrease of CI in 2021 compared with that in 1990 (ASMR: 0.25 and 0.18; ASDR: 0.26 and 0.22), representing a reduction in relative health inequality between high-income and low-income countries during this period. Abbreviations: COPD, chronic obstructive pulmonary disease; PM, particulate matter; DALY, disability-adjusted life year; ASMR, age-standardized death rate; ASDR, age-standardized DALY rate; SDI, socio-demographic index; CI, concentration index.
